# Supplementary material for: Cost-Effectiveness of Price Subsidies on Fortified Packaged Infant Cereals in Reducing Iron Deficiency Anemia in 6-23-Month-Old-Children in Urban India
Source: PubMed Central journal article supplement (PMC4830591; doi:10.1371/journal.pone.0152800), 2016-04-13
Supplement: pone.0152800.s001.pdf [file pone.0152800.s001.pdf]

**PROJECT INFANS - DQ45420**  
**RECRUITMENT AND HOUSEHOLD ASSESSMENT – NEW VERSION**

|               |           |    |              |    |        |    |         |    |        |
|---------------|-----------|----|--------------|----|--------|----|---------|----|--------|
| <b>CENTER</b> | Delhi     | 01 | Kolkata      | 02 | Mumbai | 03 | Chennai | 04 | 111-12 |
|               | Lucknow   | 05 | Patna        | 06 | Pune   | 07 | Vizag   | 08 |        |
|               | Jalandhar | 09 | Bhubaneshwar | 10 | Bilai  | 11 | Cochin  | 12 |        |

|                                   |  |  |  |  |  |  |  |  |         |
|-----------------------------------|--|--|--|--|--|--|--|--|---------|
| <b>Name of Respondent</b>         |  |  |  |  |  |  |  |  | 113-132 |
| <b>Name of the Child (6-23 m)</b> |  |  |  |  |  |  |  |  | 133-152 |
| <b>Address/ Landmark</b>          |  |  |  |  |  |  |  |  |         |
|                                   |  |  |  |  |  |  |  |  |         |
| <b>City</b>                       |  |  |  |  |  |  |  |  |         |
| <b>Mobile</b>                     |  |  |  |  |  |  |  |  | 153-162 |

|                            |  |  |   |        |                           |   |  |         |         |
|----------------------------|--|--|---|--------|---------------------------|---|--|---------|---------|
| <b>Name of Supervisor:</b> |  |  |   |        | <b>Supervisor's Code</b>  |   |  |         | 163-164 |
| <b>Interviewer's Name:</b> |  |  |   |        | <b>Interviewer's Code</b> |   |  |         | 165-166 |
| <b>Starting Area:</b>      |  |  |   |        | <b>SA Code</b>            |   |  |         | 187-88  |
| <b>Interview Number:</b>   |  |  |   | 189-91 |                           |   |  |         |         |
| <b>Date of Interview</b>   |  |  | 2 | 0      | 1                         | 3 |  | 167-170 |         |

| ACCOMPANIED              |   |         |  | BACK CHECKED             |          |          |         | SCRUTINIZED              |   |  |         |
|--------------------------|---|---------|--|--------------------------|----------|----------|---------|--------------------------|---|--|---------|
|                          |   |         |  |                          | <b>P</b> | <b>T</b> |         |                          |   |  |         |
| <b>TL</b>                | 1 |         |  | <b>TL</b>                | 1        | 5        |         | <b>TL</b>                | 1 |  |         |
| <b>EIC</b>               | 2 |         |  | <b>EIC</b>               | 2        | 6        |         | <b>EIC</b>               | 2 |  |         |
| <b>OFE</b>               | 3 |         |  | <b>OFE</b>               | 3        | 7        |         | <b>OFE</b>               | 3 |  |         |
| <b>FM</b>                | 4 |         |  | <b>FM</b>                | 4        | 8        |         | <b>FM</b>                | 4 |  |         |
|                          |   | 171-174 |  |                          |          |          | 175-182 |                          |   |  | 183-186 |
| Signature: TL/EIC/OFE/FM |   |         |  | Signature: TL/EIC/OFE/FM |          |          |         | Signature: TL/EIC/OFE/FM |   |  |         |

| QUOTA GRID   |   |     |   |               |   |
|--------------|---|-----|---|---------------|---|
| AGE OF CHILD |   | SEC |   | SEGMENT       |   |
| 6-12 months  | 1 | A   | 1 | Current Buyer | 1 |
| 13-18 months | 2 | B   | 2 | Non- Buyer    | 2 |
| 19-23 months | 3 | C   | 3 |               |   |
|              |   | D   | 4 |               |   |
|              |   | E   | 5 |               |   |

211

212

213

|                                  | LANGUAGE OF QUESTIONNAIRE (SINGLE CODE) | LANGUAGE OF RESPONDENT (SINGLE CODE) | LANGUAGE OF INTERVIEW (SINGLE CODE) |
|----------------------------------|-----------------------------------------|--------------------------------------|-------------------------------------|
| English                          | 01                                      | 01                                   | 01                                  |
| Hindi                            | 02                                      | 02                                   | 02                                  |
| Bengali                          | 03                                      | 03                                   | 03                                  |
| Oriya                            | 04                                      | 04                                   | 04                                  |
| Gujarati                         | 05                                      | 05                                   | 05                                  |
| Tamil                            | 06                                      | 06                                   | 06                                  |
| Kannada                          | 07                                      | 07                                   | 07                                  |
| Telugu                           | 08                                      | 08                                   | 08                                  |
| Any other (please specify) _____ |                                         |                                      |                                     |

214-215

216-217

218-219

| 1 <sup>ST</sup> CONTACT DETAILS                                                                                               |  |  |  |  |                                    |   |                 |                 |   |   |   |   |         |
|-------------------------------------------------------------------------------------------------------------------------------|--|--|--|--|------------------------------------|---|-----------------|-----------------|---|---|---|---|---------|
| <b>Date (DD-MM-YYYY):</b>                                                                                                     |  |  |  |  |                                    |   |                 |                 | 2 | 0 | 1 | 3 | 220-223 |
| <b>Time of contact (HH-MM):</b><br><i>PLEASE INDICATE 24 HOUR FORMAT.<br/>FOR EXAMPLE, 6:30PM SHOULD BE RECORDED AS 18:30</i> |  |  |  |  |                                    |   |                 |                 |   |   |   |   | 224-227 |
| <b>No one at home</b>                                                                                                         |  |  |  |  | No one at home                     | 1 | Someone at home | 2               |   |   |   |   | 228     |
|                                                                                                                               |  |  |  |  | <b>CONTACT 2<sup>ND</sup> TIME</b> |   |                 | <b>CONTINUE</b> |   |   |   |   |         |

**APPROACH ANY ADULT & SAY**

Good \_\_\_\_\_ or Namaste! I am \_\_\_\_\_ (**MENTION YOUR NAME**) from IMRB International, a leading market research organization. **Before starting this interview, I wish to confirm that this interview complies with the Market Research Society of India (MRSI) and International code of ethics for market research.** Please be assured that all information given by you will be kept strictly confidential and not revealed to our client with your name/contact details without your prior permission. The response collected will be added together with the responses of others before presenting the findings. Under no circumstance will this information be used for sales or any commercial purpose.

नमस्ते ..... मेरा नाम ..... है और मैं आईएमआरबी इंटरनेशनल, एक अग्रणी मार्केट रिसर्च कंपनी से हूँ। इंटरव्यू शुरू करने से पहले, मैं पूष्टि करना चाहूंगा कि यह इंटरव्यू भारत की मार्केट रिसर्च सोसायटी (एमआरएसआई) और मार्केट रिसर्च के लिए नैतिकता के अंतर्राष्ट्रीय कोडस का पालन करके किया जा रहा है। कृपया आश्वस्त रहे कि आपके द्वारा दी गयी सभी जानकारी पूरी तरह गोपनीय रखी जायेगी और बिना आपकी इजाजत के आपका नाम/ संपर्क विवरण को हमारे किसी क्लाइंट को नहीं दिया जायेगा। आपसे एकत्र की गयी सभी जानकारी निष्कर्ष पेश करने से पहले अन्य लोगों की प्रतिक्रिया के साथ मिलाई जायेगी। किसी भी परिस्थिति के अंदर यह जानकारी किसी बिक्री या व्यवसायिक उद्देश्य के लिए इस्तेमाल नहीं की जायेगी।

Do you have any queries before I start the interview? For further clarification, you may also contact my senior at IMRB International at any point during this interview.

मैं इंटरव्यू शुरू करूँ उससे पहले क्या आपको कोई शंका है? ज्यादा स्पष्टीकरण के लिए आप इंटरव्यू के दौरान किसी भी समय पर आईएमआरबी इंटरनेशनल में मेरे वरिष्ठ अधिकारी को भी संपर्क कर सकते हैं।

**INTERVIEWER TO CLARIFY AND PROVIDE ASSURANCE**

**TIME OF START:** \_\_\_\_\_ **TIME OF END:** \_\_\_\_\_ **TOTAL DURATION:** \_\_\_\_\_

**Q101** Is at least one child 6 months to less than 2 years old living in the household? **SINGLE CODING ONLY**  
क्या कम से कम एक 6 महीनो से 2 वर्ष से कम उम्र का बच्चा आपके घर में रहता है ?

|         |   |                  |
|---------|---|------------------|
| Yes हाँ | 1 | <b>CONTINUE</b>  |
| No नहीं | 2 | <b>TERMINATE</b> |

**Q102** Please tell me the name, age and birth date of each mother of children at least 6 months old but less than 2 years old living here. **RECORD DETAILS**

कृपया मुझे यहां रहने वाले सभी कम से कम 6 महीनो परन्तु 2 वर्ष से कम उम्र के बच्चो की प्रत्येक माँ की जन्मतिथि, नाम और उम्र बताए।

| MOTHERS OF CHILDREN IN 6- 23 MONTHS AGE GROUP |                 |                                     |                                           |       |  |        |                 |
|-----------------------------------------------|-----------------|-------------------------------------|-------------------------------------------|-------|--|--------|-----------------|
| Sr. No.                                       | Name            | Age (in years)                      | Birth Date<br>(SHOULD BE BETWEEN 1 TO 31) |       |  |        | Selected Mother |
|                                               | RECORD VERBATIM | RECORD VERBATIM WITH LEADING ZEROES |                                           |       |  | Circle |                 |
|                                               |                 |                                     | Date                                      | Month |  |        |                 |
| 1.                                            |                 |                                     |                                           |       |  | 1      | 230-236         |
| 2.                                            |                 |                                     |                                           |       |  | 2      | 237-243         |
| 3.                                            |                 |                                     |                                           |       |  | 3      | 244-250         |
| 4.                                            |                 |                                     |                                           |       |  | 4      | 251-257         |
| 5.                                            |                 |                                     |                                           |       |  | 5      | 258-264         |

**IF MORE THAN 1 MOTHER WITH CHILD 6-23 MONTHS OLD LIVING IN THE HOUSE, SELECT THE MOTHER WHO WAS LAST TO HAVE HER BIRTHDAY (MOST RECENT BIRTHDAY)**

**Q103** Does the mother of the child 6 months to less than 2 years old live here? **SINGLE CODING ONLY**  
क्या 6 महीनो से 2 वर्ष की उम्र से कम के बच्चे की माँ यहां रहती है ?

|         |   |           |
|---------|---|-----------|
| Yes हाँ | 1 | CONTINUE  |
| No नहीं | 2 | TERMINATE |

265

**Q104** Is the mother available? May we speak with her? **SINGLE CODING ONLY**  
क्या माँ उपलब्ध है ? क्या मैं उनसे बात कर सकता हूँ ?

|         |   |                |
|---------|---|----------------|
| Yes हाँ | 1 | CONTINUE       |
| No नहीं | 2 | SECOND CONTACT |

266

**IF NOT AVAILABLE, ARRANGE FOR A SUITABLE TIME TO COME BACK.**

| 2 <sup>ND</sup> CONTACT DETAILS                                                                                        |  |  |  |                |   |                              |   |                          |          |   |   |         |
|------------------------------------------------------------------------------------------------------------------------|--|--|--|----------------|---|------------------------------|---|--------------------------|----------|---|---|---------|
| Date (DD-MM-YYYY):                                                                                                     |  |  |  |                |   |                              |   | 2                        | 0        | 1 | 3 | 267-270 |
| Time of contact (HH-MM):<br><i>PLEASE INDICATE 24 HOUR FORMAT.<br/>FOR EXAMPLE, 6:30PM SHOULD BE RECORDED AS 18:30</i> |  |  |  |                |   |                              |   |                          |          |   |   | 271-274 |
| No one at home                                                                                                         |  |  |  | No one at home | 1 | Concerned female NOT at home | 2 | Concerned female at home |          | 3 |   | 275     |
|                                                                                                                        |  |  |  |                |   | TERMINATE                    |   |                          | CONTINUE |   |   |         |

#### TALK TO PROBABILITY RESPONDENT & REPEAT INTRODUCTION

Good\_\_\_\_\_ or Namaste! I am\_\_\_\_\_ (MENTION YOUR NAME) from IMRB International, a leading market research organization. **Before starting this interview, I wish to confirm that this interview complies with the Market Research Society of India (MRSI) and International code of ethics for market research.** Please be assured that all information given by you will be kept strictly confidential and not revealed to our client with your name/contact details without your prior permission. The response collected will be added together with the responses of others before presenting the findings. Under no circumstance will this information be used for sales or any commercial purpose.

नमस्ते ..... मेरा नाम ..... है और मैं आईएमआरबी इंटरनेशनल, एक अग्रणी मार्केट रिसर्च कंपनी से हूँ। इंटरव्यू शुरू करने से पहले, मैं पूष्टि करना चाहूंगा कि यह इंटरव्यू भारत की मार्केट रिसर्च सोसायटी (एमआरएसआई) और मार्केट रिसर्च के लिए नैतिकता के अंतर्राष्ट्रीय कोडस का पालन करके किया जा रहा है। कृपया आश्वस्त रहे कि आपके द्वारा दी गयी सभी जानकारी पूरी तरह गोपनीय रखी जायेगी और बिना आपकी इजाजत के आपका नाम/ संपर्क विवरण को हमारे किसी क्लाइंट को नहीं दिया जायेगा। आपसे एकत्र की गयी सभी जानकारी निष्कर्ष पेश करने से पहले अन्य लोगो की प्रतिक्रिया के साथ मिलाई जायेगी। किसी भी परिस्थिति के अंदर यह जानकारी किसी बिक्री या व्यवसायिक उद्देश्य के लिए इस्तेमाल नहीं की जायेगी।

We are carrying out a survey on the food & beverage consumption by children 6 months to less than 2 years of age. The survey will take about 45 minutes.

हम 6 महीनो से 2 वर्ष से कम उम्र के बच्चो द्वारा खाद्य और पेय पदार्थो की खपत पर सर्वे कर रहे है। यह सर्वे करीब 45 मिनट का समय लेगा।

Do you have any queries before I start the interview? For further clarification, you may also contact my senior at IMRB International at any point during this interview.

मैं इंटरव्यू शुरू करूं उससे पहले क्या आपको कोई शंका है ? ज्यादा स्पष्टीकरण के लिए आप इंटरव्यू के दौरान किसी भी समय पर आईएमआरबी इंटरनेशनल मे मेरे वरिष्ठ अधिकारी को भी संपर्क कर सकते है।

**INTERVIEWER TO CLARIFY AND PROVIDE ASSURANCE**

Q105

|                                                                                                            |   |                  |                |
|------------------------------------------------------------------------------------------------------------|---|------------------|----------------|
| Selected mother is available and agrees to participate<br>चयनित माँ उपलब्ध और हिस्सा लेने के लिए सहमत      | 1 | CONTINUE         |                |
| Selected mother is available but refuses to participate<br>चयनित माँ उपलब्ध परन्तु हिस्सा लेने से मना किया | 2 | TERMINATE        | RECORD REASON: |
| Selected mother is not available<br>चयनित माँ उपलब्ध नहीं                                                  | 3 | CONTACT 2ND TIME |                |

276

277-285

**Q106 SHOWCARD Q106** Thinking about the food/ beverages to buy for your child 6 months to less than 2 years old, which of these statements best applies to you? **SINGLE CODING ONLY**

आपके 6 महीनो से 2 वर्ष से कम उम्र के बच्चे के लिए खाद्य/ पेय पदार्थों की खरीदारी के बारे में सोचते हुए, इनमें से कौन सा वाक्य आपके लिए लागू होता है।

|                                                                                                                                                                                                    |                                                                                                                                                                              |   |           |
|----------------------------------------------------------------------------------------------------------------------------------------------------------------------------------------------------|------------------------------------------------------------------------------------------------------------------------------------------------------------------------------|---|-----------|
| I am the person who <b>MOST OFTEN</b> decides and buys for my child what food/ beverage to buy for him/ her                                                                                        | मैं वह व्यक्ति हूँ जो बच्चे के लिए क्या खाने/ पाने की खरीदारी और उसके निर्णय में ज्यादातर शामिल होती हूँ                                                                     | 1 | CONTINUE  |
| <b>I AM NOT</b> the person who <b>MOST OFTEN BUYS</b> for my child what food/ beverage to buy for him/ her, but I often <b>ACTIVELY PARTICIPATE</b> in deciding food/ beverage to buy for him/ her | मैं वह व्यक्ति नहीं हूँ जो ज्यादातर मेरे बच्चे के लिए खाने/ पाने के लिए खरीदारी करता है, परन्तु मैं बच्चे के लिए खाने/ पाने की खरीदारी के निर्णय में सक्रिय रूप से शामिल हूँ | 2 |           |
| I only <b>SOMETIMES PARTICIPATE</b> in deciding for my child what food/ beverage to buy for him/ her                                                                                               | मैं कभी कभी मेरे बच्चों के लिए खाने/ पाने के लिए खरीदारी के लिए निर्णय में हिस्सा लेती हूँ                                                                                   | 3 | TERMINATE |
| <b>I NEVER</b> or <b>HARDLY EVER</b> decide for my child what food/ beverage to buy for him/ her                                                                                                   | मैं मेरे बच्चों के लिए खाने/ पाने के लिए खरीदारी के लिए कम बार या कभी नहीं निर्णय लेती हूँ                                                                                   | 4 |           |

311

**SHOW CARD Q107**

**Q107** Do you or anyone of your family work for any of these companies / organizations? (It could be full time or part time). **MULTIPLE CODING POSSIBLE**

क्या आप या आपके परिवार का कोई सदस्य इनमें से किसी कंपनियों/ संगठनों के लिए कार्य करता है? (यह फूल टाइम या पार्ट टाइम हो सकता है)।

|                                           |                                          |    |           |
|-------------------------------------------|------------------------------------------|----|-----------|
| Advertising                               | विज्ञापन                                 | 01 | TERMINATE |
| Market research                           | मार्केट रिसर्च                           | 02 |           |
| Marketing                                 | मार्केटिंग                               | 03 |           |
| Journalism                                | पत्रकारिता                               | 04 |           |
| Infant food products manufacturer         | शिशु खाद्य प्रोडक्ट निर्माता             | 05 |           |
| Grocery products Retailer/ Wholesaler     | किराना प्रोडक्ट्स के रिटेलर/ होलसेलर     | 06 |           |
| Infant food products retailer/ wholesaler | शिशु खाद्य प्रोडक्ट्स के रिटेलर/ होलसेलर | 07 |           |
| Bank                                      | बैंक                                     | 08 | CONTINUE  |
| Railways                                  | रेलवे                                    | 09 |           |
| Municipality                              | नगर निगम                                 | 10 |           |
| None of these                             | इनमें से कोई नहीं                        | 99 |           |

312-317

**Q108** Have you participated in any market research surveys during the **past six months**? **SINGLE CODING ONLY**  
पिछले 6 महीनो के दौरान क्या आपने किसी मार्केट रिसर्च सर्वे में हिस्सा लिया है?

|         |     |           |
|---------|-----|-----------|
| Yes हाँ | 1   | TERMINATE |
| No नहीं | 2   | CONTINUE  |
|         | 318 |           |

|                                  |
|----------------------------------|
| <b>HH Composition Assessment</b> |
|----------------------------------|

**Q206** Please tell me the name, gender, birth date and age of all the children and adults, from youngest to oldest, who usually sleep and eat in your household. I will compile a list starting with the children between 6 and 23 months of age. **RECORD DETAILS.** Please also include any domestic servant who lives in your household.

सबसे छोटे से शुरू करते हुए कृप्या मुझे सभी बच्चों और व्यक्तियों के नाम, लिंग, जन्मतिथि और उम्र बताएं, जो आपके घर में खाते और सोते हैं। मैं 6 और 23 महीनों की उम्र के बीच बच्चों के साथ शुरू करते हुए सूची को बनाऊंगा। कृप्या किसी घरेलू नौकर को भी शामिल करें जो घर में रहता है।

**START WITH CHILDREN 6-23 MONTHS FIRST.  
THEN THE RESPONDENT (MOTHER).  
THEN ALL OTHER MEMBERS OF THE FAMILY FROM YOUNGEST TO ELDEST.**

**Q207** GENDER. SINGLE CODING ONLY

**Q208** DATE OF BIRTH. RECORD DATE/ MONTH/ YEAR

**RECORD DATE OF BIRTH OF ONLY CHILDREN IN AGE GROUP 6 MONTHS TO 23 MONTHS AND THE SELECTED MOTHER**

केवल 6 महीनों से 23 महीनों तक की आयु-समूह में बच्चों और चुनी माँ की जन्मतिथि को दर्ज करें

**Q209** AGE. FOR KIDS LESS THAN 2 YEARS OLD, RECORD AGE IN MONTHS. FOR OTHERS, RECORD AGE IN YEARS

**NOTE TO INTERVIEWER: AGE MUST BE CONSISTENT WITH BIRTH DATE.**

**Q210** POSITION IN THE FAMILY. RECORD ACCORDING TO CODES BELOW

|                                                                                                                             |   |
|-----------------------------------------------------------------------------------------------------------------------------|---|
| Husband of the respondents/ father of the child बच्चे के पिता/ रिस्पॉण्डेंट के पति                                          | 1 |
| Respondent/ Mother of the child रिस्पॉण्डेंट/ बच्चे की माँ                                                                  | 2 |
| Child of the respondent/ Son or daughter रिस्पॉण्डेंट का बच्चा/ बेटा या बेटी                                                | 3 |
| Parent of the respondent or her husband/ Grandparent of the child रिस्पॉण्डेंट या उसके पति के माता पिता/ बच्चे के दादा दादी | 4 |
| Other Relatives अन्य रिश्तेदार                                                                                              | 5 |

**SELECTED CHILD**

**IF ONLY 1 CHILD AGED 6-23 MONTHS AND CODED '3' IN Q210, CHOOSE HIM/HER AS SELECTED CHILD**

**IF MORE THAN 1 CHILD AGED 6-23 MONTHS AND CODED '3' IN Q210: SELECT THE CHILD WHO WAS LAST TO HAVE HIS/HER BIRTHDATE (MOST RECENT BIRTHDATE).**

**NAME OF SELECTED CHILD:** \_\_\_\_\_

**Q210b** **SHOWCARD Q210b** Which of the following applies to \_\_\_\_\_ (NAME OF SELECTED CHILD)? **SINGLE CODING ONLY**

..... पर इनमें से कौन सा लागू होते हैं ?

|                                                                |                                                                                  |   |                                                         |
|----------------------------------------------------------------|----------------------------------------------------------------------------------|---|---------------------------------------------------------|
| I only feed breast milk                                        | मैं केवल स्तनपान कराती हूँ                                                       | 1 | <b>MAINTAIN RQ AND TERMINATE</b><br><br><b>CONTINUE</b> |
| I feed both breast milk and other food/ drink items            | मैं स्तनपान और अन्य आहार/पेय सामग्रियों को खिलाती/पिलाती हूँ                     | 2 |                                                         |
| I feed only other food/ drink items and don't feed breast milk | मैं केवल अन्य आहार/पेय सामग्रियों को खिलाती/पिलाती हूँ और स्तनपान नहीं कराती हूँ | 3 |                                                         |

**Q211 RELATIONSHIP WITH HEAD OF THE HOUSEHOLD (SOMEONE WHO CONTRIBUTES MOST TO THE HOUSEHOLD INCOME)**

|                               |                                 |    |
|-------------------------------|---------------------------------|----|
| Head                          | मुखिया                          | 01 |
| Wife/ husband                 | पत्नी/ पति                      | 02 |
| Son/ daughter                 | बेटा/ बेटी                      | 03 |
| Son in law/ daughter in law   | दामाद/ बहु                      | 04 |
| Grand child                   | पोते पोती                       | 05 |
| Parent                        | माता पिता                       | 06 |
| Parent in law                 | सास/ ससुर                       | 07 |
| Brother/ sister               | भाई/ बहन                        | 08 |
| Brother in law/ sister in law | देवर/ ननद/ साला/ साली           | 09 |
| Niece/ nephew                 | भतीजा/ भतीजी/ भांजा /<br>भांजी  | 10 |
| Other relative                | अन्य रिश्तेदार                  | 11 |
| Adopted/ foster/ step child   | गोद लिया/ अनाथ/ सौतेला<br>बच्चा | 12 |
| Domestic servant              | घरेलु नौकर                      | 13 |
| Other not related             | अन्य असंबंधित                   | 14 |
| Don't know                    | पता नही                         | 98 |

| Sr. No. | Q206                   | Q207 |        | Q208 |       |      |  |  |                                           | Q209               | Q210         | Q211 | Selected Child (SINGLE CODE) |    |         |
|---------|------------------------|------|--------|------|-------|------|--|--|-------------------------------------------|--------------------|--------------|------|------------------------------|----|---------|
|         | Name (RECORD VERBATIM) | Male | Female | Date | Month | Year |  |  | Age (RECORD VERBATIM WITH LEADING ZEROES) | Position in Family | Relationship |      |                              |    |         |
| 1.      |                        | 1    | 2      |      |       |      |  |  |                                           |                    |              |      |                              | 01 | 326-341 |
| 2.      |                        | 1    | 2      |      |       |      |  |  |                                           |                    |              |      |                              | 02 | 342-357 |
| 3.      |                        | 1    | 2      |      |       |      |  |  |                                           |                    |              |      |                              | 03 | 358-373 |
| 4.      |                        | 1    | 2      |      |       |      |  |  |                                           |                    |              |      |                              | 04 | 374-389 |
| 5.      |                        | 1    | 2      |      |       |      |  |  |                                           |                    |              |      |                              | 05 | 411-426 |
| 6.      |                        | 1    | 2      |      |       |      |  |  |                                           |                    |              |      |                              | 06 | 427-442 |
| 7.      |                        | 1    | 2      |      |       |      |  |  |                                           |                    |              |      |                              | 07 | 443-458 |
| 8.      |                        | 1    | 2      |      |       |      |  |  |                                           |                    |              |      |                              | 08 | 459-474 |
| 9.      |                        | 1    | 2      |      |       |      |  |  |                                           |                    |              |      |                              | 09 | 475-490 |
| 10.     |                        | 1    | 2      |      |       |      |  |  |                                           |                    |              |      |                              | 10 | 511-526 |
| 11.     |                        | 1    | 2      |      |       |      |  |  |                                           |                    |              |      |                              | 11 | 527-542 |
| 12.     |                        | 1    | 2      |      |       |      |  |  |                                           |                    |              |      |                              | 12 | 543-558 |
| 13.     |                        | 1    | 2      |      |       |      |  |  |                                           |                    |              |      |                              | 13 | 559-574 |
| 14.     |                        | 1    | 2      |      |       |      |  |  |                                           |                    |              |      |                              | 14 | 575-590 |
| 15.     |                        | 1    | 2      |      |       |      |  |  |                                           |                    |              |      |                              | 15 | 611-626 |

**Q201** Now I would like to ask some questions about you.

What's your name? **RECORD VERBATIM**

आपका नाम क्या है ?

**NAME OF RESPONDENT:** \_\_\_\_\_

**Q202** How old were you at your last birthday? **WRITE EXACT AGE IN THE BOX BELOW AND THEN CODE RELEVANT AGE BAND BELOW. SINGLE CODING ONLY**

आपके पिछले जन्मदिन पर आप कितने वर्ष के थे ?

|                                     |   |        |
|-------------------------------------|---|--------|
|                                     |   | 319-20 |
| Less than 15 years<br>15 वर्ष से कम | 1 |        |
| 15 yrs – 20 yrs                     | 2 |        |
| 21 yrs – 25 yrs                     | 3 |        |
| 26 yrs – 30 yrs                     | 4 |        |
| 31 yrs – 35 yrs                     | 5 |        |
| 36 yrs – 40 yrs                     | 6 |        |
| 41 yrs – 45 yrs                     | 7 |        |
| 46 yrs – 55 yrs                     | 8 |        |
| Above 55 years<br>55 वर्ष से अधिक   | 9 |        |

321

**Q203** **MARITAL STATUS. SINGLE CODING ONLY**

|                                                                      |   |
|----------------------------------------------------------------------|---|
| Currently married<br>वर्तमान विवाहित                                 | 1 |
| Married, but gauna not performed<br>विवाहित, परन्तु गौना नहीं<br>हुआ | 2 |
| Widowed<br>विधवा                                                     | 3 |
| Divorced<br>तलाकशुदा                                                 | 4 |
| Separated<br>अलग                                                     | 5 |
| Deserted<br>डेसर्टड                                                  | 6 |
| Never married<br>विवाहित नहीं                                        | 7 |

322

**Q204** What is the highest grade you have completed? **SINGLE CODING ONLY**

आपके द्वारा पूरा किया गया शिक्षा का उच्चतम स्तर क्या है ?

|                                         |    |
|-----------------------------------------|----|
| Illiterate                              | 01 |
| Illiterate but can read                 | 02 |
| Up to 4 yrs of school                   | 03 |
| 5-9 yrs of school                       | 04 |
| SSC / 10 <sup>TH</sup> Class            | 05 |
| 11 <sup>th</sup> Class                  | 06 |
| 12 <sup>th</sup> Class / HSC            | 07 |
| Pursuing College                        | 08 |
| Graduate / Post graduate (Gen)          | 09 |
| Graduate / Post graduate (professional) | 10 |

323-24

**Q205** Please tell me your working status. **SINGLE CODING ONLY**

कृपया मुझे आपका कार्य स्तर बताएं।

|                                                                  |   |
|------------------------------------------------------------------|---|
| Not working/ homemaker कार्यरत नहीं/ गृहिणी                      | 1 |
| Working part time/ free lancer पार्ट टाइम कार्यरत/ फ्री<br>लांसर | 2 |
| Working full time पूरा समय कार्यरत                               | 3 |

325

**GO TO THE MAIN INTERVIEW**
