# Supplementary material for: Cost-Effectiveness of Price Subsidies on Fortified Packaged Infant Cereals in Reducing Iron Deficiency Anemia in 6-23-Month-Old-Children in Urban India
Source: PubMed Central journal article supplement (PMC4830591; doi:10.1371/journal.pone.0152800), 2016-04-13
Supplement: pone.0152800.s002.pdf [file pone.0152800.s002.pdf]

**PROJECT INFANS - DQ45420**  
**Main Questionnaire – NEW VERSION**

|               |           |    |              |    |        |    |         |    |        |
|---------------|-----------|----|--------------|----|--------|----|---------|----|--------|
| <b>CENTER</b> | Delhi     | 01 | Kolkata      | 02 | Mumbai | 03 | Chennai | 04 | 711-12 |
|               | Lucknow   | 05 | Patna        | 06 | Pune   | 07 | Vizag   | 08 |        |
|               | Jalandhar | 09 | Bhubaneshwar | 10 | Bhilai | 11 | Cochin  | 12 |        |

|                                   |  |  |  |  |  |  |  |  |  |  |
|-----------------------------------|--|--|--|--|--|--|--|--|--|--|
| <b>Name of Respondent</b>         |  |  |  |  |  |  |  |  |  |  |
| <b>Name of the Child (6-23 m)</b> |  |  |  |  |  |  |  |  |  |  |
| <b>Address/ Landmark</b>          |  |  |  |  |  |  |  |  |  |  |
|                                   |  |  |  |  |  |  |  |  |  |  |
|                                   |  |  |  |  |  |  |  |  |  |  |
| <b>City</b>                       |  |  |  |  |  |  |  |  |  |  |
| <b>Mobile</b>                     |  |  |  |  |  |  |  |  |  |  |

|                            |  |  |  |  |   |   |         |                           |      |     |  |         |
|----------------------------|--|--|--|--|---|---|---------|---------------------------|------|-----|--|---------|
| <b>Name of Supervisor:</b> |  |  |  |  |   |   |         | <b>Supervisor's Code</b>  |      |     |  | 713-714 |
| <b>Interviewer's Name:</b> |  |  |  |  |   |   |         | <b>Interviewer's Code</b> |      |     |  | 715-716 |
| <b>Starting Area:</b>      |  |  |  |  |   |   |         | <b>SA Code</b>            |      |     |  | 1888-89 |
| <b>Interview Number:</b>   |  |  |  |  |   |   | 1890-92 |                           |      |     |  |         |
| <b>Date of Interview</b>   |  |  |  |  | 2 | 0 | 1       | 3                         | 717- | 720 |  |         |

| ACCOMPANIED              |   |         |  | BACK CHECKED             |   |   |         | SCRUTINIZED              |   |  |         |
|--------------------------|---|---------|--|--------------------------|---|---|---------|--------------------------|---|--|---------|
|                          |   |         |  |                          | P | T |         |                          |   |  |         |
| TL                       | 1 |         |  | TL                       | 1 | 5 |         | TL                       | 1 |  |         |
| EIC                      | 2 |         |  | EIC                      | 2 | 6 |         | EIC                      | 2 |  |         |
| OFE                      | 3 |         |  | OFE                      | 3 | 7 |         | OFE                      | 3 |  |         |
| FM                       | 4 |         |  | FM                       | 4 | 8 |         | FM                       | 4 |  |         |
|                          |   | 721-724 |  |                          |   |   | 725-732 |                          |   |  | 733-736 |
| Signature: TL/EIC/OFE/FM |   |         |  | Signature: TL/EIC/OFE/FM |   |   |         | Signature: TL/EIC/OFE/FM |   |  |         |

| QUOTA GRID    |   |     |   |               |   |
|---------------|---|-----|---|---------------|---|
| AGE OF CHILD  |   | SEC |   | SEGMENT       |   |
| 6-12 months   | 1 | A   | 1 | Current Buyer | 1 |
| 13-18 months  | 2 | B   | 2 | Non Buyer     | 2 |
| 19- 23 months | 3 | C   | 3 |               |   |
|               |   | D   | 4 |               |   |
|               |   | E   | 5 |               |   |

737

738

739

**TIME OF START:** \_\_\_\_\_ **TIME OF END:** \_\_\_\_\_ **TOTAL DURATION:** \_\_\_\_\_

|                           |
|---------------------------|
| <b>Main Questionnaire</b> |
|---------------------------|

|                                           |
|-------------------------------------------|
| <b>Purchase &amp; Consumption Section</b> |
|-------------------------------------------|

**CODE RESPONSES FOR Q301– Q303 IN THE GRID GIVEN AFTER Q303****SHOW PHOTOCARDS**

**Q301** Please tell me in past 3 days what all has [REFERENT CHILD] consumed? Please include all food items and beverages the child has consumed. **MULTIPLE CODING POSSIBLE**

कृपया मुझे बताएं पिछले 3 दिनों में ..... ने क्या सब खाया था? कृपया सभी खाद्य वस्तुओं और पेय पदार्थों को शामिल करें जो कि बच्चे ने खाया/ पी है।

*Please do not include today's day when we say past 3 days. Please include 3 days with third day ending yesterday night – 12am.*

कृपया आज का दिन न मिलाएं। पिछले 3 दिनों के बारे में बताएं जो कल रात 12 बजे खतम हुए हों।

**SHOW PHOTOCARD FOR EACH CATEGORY CODED IN Q301**

**Q303 SHOWCARD Q303** Please tell me approx. how many servings of each item does the child eat in a week? **SINGLE CODING ONLY**

कृपया मुझे बताएं अंदाजन एक सप्ताह में बच्चा प्रत्येक वस्तु की कितनी सर्विंग खाता है?

| SHOW CARD Q303                        |                                      |    |
|---------------------------------------|--------------------------------------|----|
| 6 times per day or more               | प्रति दिन 6 या ज्यादा बार            | 01 |
| 5 times per day                       | प्रति दिन 5 बार                      | 02 |
| 4 times per day                       | प्रति दिन 4 बार                      | 03 |
| 3 times per day                       | प्रति दिन 3 बार                      | 04 |
| 2 times per day                       | प्रति दिन 2 बार                      | 05 |
| 1 time per day                        | प्रति दिन 1 बार                      | 06 |
| 5-6 times per week                    | प्रति सप्ताह 5-6 बार                 | 07 |
| 3-4 times per week                    | प्रति सप्ताह 3-4 बार                 | 08 |
| 1-2 times per week                    | प्रति सप्ताह 1-2 बार                 | 09 |
| Less often                            | कम बार                               | 10 |
| During emergencies/ special occasions | आपातस्थितियों/ विशेष अवसरों के दौरान | 11 |
| Don't know / remember                 | पता नहीं/ याद नहीं                   | 98 |

| Q301                                                                                                                               |                                                                                                                             |           | Q303     |  |         |
|------------------------------------------------------------------------------------------------------------------------------------|-----------------------------------------------------------------------------------------------------------------------------|-----------|----------|--|---------|
| Name of Item Consumed in Past 3 Days                                                                                               |                                                                                                                             | Item Code | Servings |  |         |
| <b>Breast Milk</b>                                                                                                                 | माँ का दूध                                                                                                                  | 084       |          |  | 740-45  |
| <b>Cereals like Daliya/ Khichdi/ Mixed Grains/ Sewiya</b>                                                                          | सीरियल्स जैसे दलिया/खिचड़ी/मिले अनाज/सेवईया                                                                                 | 151       |          |  | 746-51  |
| <b>Cereals like Ragi/ Barley/ Bajra/ Maize/ Corn</b>                                                                               | सीरियल्स जैसे रागी/जौ/बाजरा/मक्का/दाना                                                                                      | 152       |          |  | 752-57  |
| <b>Oats/ Corn flakes/ Rice flakes</b>                                                                                              | ओट्स/ कोर्नफ्लेक्स/ चावल के फ्लेक्स                                                                                         | 153       |          |  | 758-63  |
| <b>Rice/ Rice based dishes</b>                                                                                                     | चावल/ चावल से बने व्यंजन                                                                                                    | 154       |          |  | 764-69  |
| <b>Packaged Infant Cereals</b>                                                                                                     | पैकेज्ड इनफेंट सीरियल्स/ बेबी फूड                                                                                           | 155       |          |  | 770-75  |
| <b>Legumes like pulses, chana etc.</b>                                                                                             | फली जैसे दालें, चना आदि                                                                                                     | 156       |          |  | 776-81  |
| <b>Roti, Paratha, Bread, Dosa, Poori etc.</b>                                                                                      | रोटी, पराठा, ब्रेड, डोसा, पूरी आदि                                                                                          | 157       |          |  | 782-87  |
| <b>Packaged Powdered Milk</b>                                                                                                      | पैकेज्ड पाउडर्ड दूध                                                                                                         | 085       |          |  | 811-16  |
| <b>Homemade Snacks like poha, semolina/ suji/ rawa, halwa, upma, idli, puffed rice, Idiyappam, sattu, chattuah, sabudana etc.</b>  | घर में बने स्नेक्स जैसे पोहा, सेमोलिना/सूजी/रवा, हलवा, उपमा, इडली, फूले चावल, इडियापन, सत्तू, छतूआ, साबुदाना आदि            | 158       |          |  | 817-22  |
| <b>Cow milk/ buffalo milk (packaged or loose)</b>                                                                                  | गाय का दूध/भैंस का दूध (पैकेज्ड या खुला)                                                                                    | 159       |          |  | 823-28  |
| <b>Milk products like curd, raita, lassi/ chaach, cream, tea, coffee, paneer, khoya, shakes, ice cream etc</b>                     | दूध के प्रोडक्ट्स जैसे दही, रायता, लस्सी/छाछ, क्रीम, चाय, कॉफी, पनीर, खोवा, शेक्स, आईसक्रीम आदि.                            | 160       |          |  | 829-34  |
| <b>Non vegetarian foods and non veg soups</b>                                                                                      | माँसाहारी खाने और माँसाहारी सूप्स                                                                                           | 161       |          |  | 835-40  |
| <b>Infant formulas</b>                                                                                                             | इनफेंट फार्मूला                                                                                                             | 162       |          |  | 841-46  |
| <b>Fruits/ Fruit Juices/ Neembu pani</b>                                                                                           | फल/ फलों के जूस/ नींबू पानी                                                                                                 | 163       |          |  | 847-52  |
| <b>Packaged snacks/ foods like biscuits, chips, soft drinks, confectionary items, namkeens, milk additives likes Horlicks etc.</b> | पैकेज्ड स्नेक्स/फूड्स जैसे बिस्कुट्स, चिप्स, सॉफ्ट ड्रिंक्स, कॉन्फेक्शनरी सामग्रियाँ, नमकीस, दूध एडीटिव्स जैसे हॉरलिक्स आदि | 164       |          |  | 853-58  |
| <b>Vegetables and vegetable soups</b>                                                                                              | सब्जियाँ और सब्जियों के सूप्स                                                                                               | 165       |          |  | 859-64  |
| <b>Others (PLEASE SPECIFY)</b><br>अन्य (कृपया स्पष्ट करें) _____                                                                   |                                                                                                                             |           |          |  | 1077-82 |
| <b>Others (PLEASE SPECIFY)</b><br>अन्य (कृपया स्पष्ट करें) _____                                                                   |                                                                                                                             |           |          |  | 1083-88 |
| <b>Others (PLEASE SPECIFY)</b><br>अन्य (कृपया स्पष्ट करें) _____                                                                   |                                                                                                                             |           |          |  | 1111-16 |
| <b>Others (PLEASE SPECIFY)</b><br>अन्य (कृपया स्पष्ट करें) _____                                                                   |                                                                                                                             |           |          |  | 1117-22 |
| <b>Others (PLEASE SPECIFY)</b><br>अन्य (कृपया स्पष्ट करें) _____                                                                   |                                                                                                                             |           |          |  | 1123-28 |
| <b>Others (PLEASE SPECIFY)</b><br>अन्य (कृपया स्पष्ट करें) _____                                                                   |                                                                                                                             |           |          |  | 1129-34 |
| <b>Others (PLEASE SPECIFY)</b><br>अन्य (कृपया स्पष्ट करें) _____                                                                   |                                                                                                                             |           |          |  | 1135-40 |
| <b>Others (PLEASE SPECIFY)</b><br>अन्य (कृपया स्पष्ट करें) _____                                                                   |                                                                                                                             |           |          |  | 1141-46 |
| <b>Others (PLEASE SPECIFY)</b><br>अन्य (कृपया स्पष्ट करें) _____                                                                   |                                                                                                                             |           |          |  | 1147-52 |
| <b>Others (PLEASE SPECIFY)</b><br>अन्य (कृपया स्पष्ट करें) _____                                                                   |                                                                                                                             |           |          |  | 1153-58 |

| CLASSIFY AS:                                                             |                       |                      |   |                   |
|--------------------------------------------------------------------------|-----------------------|----------------------|---|-------------------|
| <b>If [REF CHILD] has consumed packaged infant cereal in last 3 days</b> | Coded 155 in Q301     | <b>CURRENT BUYER</b> | 1 | <b>GO TO Q304</b> |
| <b>Else</b>                                                              | NOT coded 155 in Q301 | <b>NON BUYER</b>     | 2 | <b>GO TO Q316</b> |

1159

**ASK Q304-Q315 IF PACKAGED INFANT CEREAL (155) CODED IN Q301****CODE RESPONSES FOR Q304– Q307 IN THE GRID GIVEN AFTER Q307**

**Q304** What was the brand of packaged infant cereal/ baby foods that was given to [REFERENT CHILD]? **RECORD VERBATIM**

..... को दिए गए पैकेज्ड शिशु अनाज/ शिशु आहार का ब्रांड क्या था ?

**Q305 SHOWCARD Q305** Please look at this card and tell me in which pack type did you buy \_\_\_\_\_ (MENTION BRANDS CODED IN Q304 ONE BY ONE)? **SINGLE CODING ONLY FOR EACH BRAND**

कृपया इस कार्ड को देखें और मुझे बताएं आपने ..... को किस पैक प्रकार में खरीदा था ?

| SHOW CARD Q305 |               |    |
|----------------|---------------|----|
| Poly-pack      | पॉली पैक      | 01 |
| Can            | कैन           | 02 |
| Tin            | टिन           | 03 |
| Plastic pack   | प्लास्टिक पैक | 04 |
| Tetra pack     | टेट्रा पैक    | 05 |
| Paper pack     | पेपर पैक      | 06 |
| Sachet         | सैशे          | 07 |
| PET bottle     | पेट बोतल      | 08 |
| Glass bottle   | ग्लास की बोतल | 09 |
| Bagging Box    | बैगिंग बॉक्स  | 10 |

**Q306** And what size did you buy of \_\_\_\_\_ (MENTION BRANDS CODED IN Q304 ONE BY ONE)? और आपने ..... का क्या साइज खरीदा ?

**PLEASE ASK RESPONDENT TO SHOW THE PACK IF AVAILABLE AT HOME AND NOTE PACK SIZE FROM THE PACK.**

**IF PACK NOT AVAILABLE OR RESPONDENT REFUSED TO SHOW THE PACK, RECORD**

**PLEASE RECORD THE PACK SIZE IN GRAMS. RECORD VERBATIM WITH LEADING ZEROES**

**Q307** a) Now please tell me out of \_\_\_\_\_ (MENTION BRANDS CODED IN Q304 ONE BY ONE) which cereal/ baby food does [REFERENT CHILD] consume most? **SINGLE CODING ONLY**

अब कृपया मुझे बताएं ..... में से कौन सा अनाज/ शिशु आहार ..... ज्यादातर खाता/पीता है ?

| Q304       | Q305      | Q306                                                              |                                 |                 | Q307a                                      |         |
|------------|-----------|-------------------------------------------------------------------|---------------------------------|-----------------|--------------------------------------------|---------|
| Brand name | Pack Type | Pack Size (ml or gram)                                            |                                 |                 | MOST OFTEN CONSUMED PACKAGED INFANT CEREAL |         |
|            |           | RECORD PACK SIZE IN GRAMS (IF CAN NOT BE ASCERTAINED RECORD 9898) | NOT AVAILABLE AT HOME CURRENTLY | REFUSED TO SHOW |                                            |         |
|            |           |                                                                   | 1                               | 2               | 1                                          | 1161-71 |
|            |           |                                                                   | 1                               | 2               | 2                                          | 1172-82 |
|            |           |                                                                   | 1                               | 2               | 3                                          | 1211-21 |
|            |           |                                                                   | 1                               | 2               | 4                                          | 1222-32 |
|            |           |                                                                   | 1                               | 2               | 5                                          | 1233-43 |

**Q307** b) When was the last time when you served packaged infant cereals to \_\_\_\_\_ (REFERENT CHILD)? **SINGLE CODING ONLY**

पिछली बार कब आपने ..... के लिए पैकेज्ड शिशु अनाज को सर्व किया था ?

|             |            |   |
|-------------|------------|---|
| Same day    | उसी दिन    | 1 |
| Yesterday   | कल         | 2 |
| 2 days back | 2 दिन पहले | 3 |
| 3 days back | 3 दिन पहले | 4 |

1244

**INSTRUCTION TO INTERVIEWER: PLEASE ASK RESPONDENT TO BRING THE SPOON THEY NORMALLY USE TO POUR PACKAGED INFANT CEREAL WHILE PREPARING FOR CHILD**

**ALSO, TAKE OUT THE SEMOLINA PACKET**

- Q308** I have with me some semolina. Please tell me with the help of this spoon, how much quantity of packaged infant cereal you gave to \_\_\_\_\_ (REFERENT CHILD) during this occasion?  
मेरे पास कुछ सेमोलिना/ सूजी है। कृप्या मुझे इस चम्मच की मदद से बताए, पैकेज्ड शिशु अनाज की कितनी मात्रा आप ने इस अवसर के दौरान ..... को दी ?

**ASK THE RESPONDENT TO PUT THE SEMOLINA IN SPOON. MEASURE THE QUANTITY USING STANDARD BEAKER AND RECORD BELOW**

|                |  |  |  |         |
|----------------|--|--|--|---------|
| QUANTITY LEVEL |  |  |  | 1246-48 |
|----------------|--|--|--|---------|

**SAY:** Now, I'll ask you some questions about the packaged infant cereal/ baby food that is consumed by the child most often i.e. \_\_\_\_\_ (MENTION CEREAL NAME CODED IN Q307)

कहे: अब, मैं आपसे पैकेज्ड शिशु अनाज/ शिशु आहार के बारे में कुछ प्रश्न पूछूंगा जो कि बच्चे द्वारा ज्यादातर खाया जाता है मतलब .....

- Q309 SHOWCARD Q309** Please tell me approx. how many servings does the child eat of this packaged infant cereal/ baby food in a week? **SINGLE CODING ONLY**

कृप्या मुझे बताए अंदाजन एक सप्ताह में इस पैकेज्ड शिशु अनाज/ शिशु आहार की कितनी सर्विंग बच्चा खाता है ?

|                                       |                                      |    |
|---------------------------------------|--------------------------------------|----|
| 6 times per day or more               | प्रति दिन 6 या ज्यादा बार            | 01 |
| 5 times per day                       | प्रति दिन 5 बार                      | 02 |
| 4 times per day                       | प्रति दिन 4 बार                      | 03 |
| 3 times per day                       | प्रति दिन 3 बार                      | 04 |
| 2 times per day                       | प्रति दिन 2 बार                      | 05 |
| 1 time per day                        | प्रति दिन 1 बार                      | 06 |
| 5-6 times per week                    | प्रति सप्ताह 5-6 बार                 | 07 |
| 3-4 times per week                    | प्रति सप्ताह 3-4 बार                 | 08 |
| 1-2 times per week                    | प्रति सप्ताह 1-2 बार                 | 09 |
| Less often                            | कम बार                               | 10 |
| During emergencies/ special occasions | आपातस्थितियों/ विशेष अवसरों के दौरान | 11 |

1249-50

**INSTRUCTION TO INTERVIEWER: NOW AGAIN TAKE THE SPOON THE RESPONDENT NORMALLY USES TO POUR PACKAGED INFANT CEREAL WHILE PREPARING FOR CHILD**

**ALSO, TAKE OUT THE SEMOLINA PACKET**

- Q310** Now please tell me with the help of this spoon, how much quantity of packaged infant cereal you generally use while making one serving for the child.

अब कृप्या इस चम्मच की मदद से मुझे बताए, पैकेज्ड शिशु अनाज की कितनी मात्रा आप सामान्यता बच्चे के लिए एक सर्विंग बनाते समय उपयोग करते हैं।

**ASK THE RESPONDENT TO PUT THE SEMOLINA IN SPOON. MEASURE THE QUANTITY USING STANDARD BEAKER AND RECORD BELOW**

|                |  |  |  |         |
|----------------|--|--|--|---------|
| QUANTITY LEVEL |  |  |  | 1251-53 |
|----------------|--|--|--|---------|

- Q311 SHOWCARD Q311** Please look at this card and tell me which of the following applies to the way this packaged infant cereal/ baby food is generally prepared? **SINGLE CODING ONLY**

कृप्या इस कार्ड को देखें और मुझे बताए निम्नलिखित में से कौन सा इस पैकेज्ड शिशु अनाज/ शिशु आहार को बनाने के तरीके पर लागू होता है ?

|                                  |                               |    |
|----------------------------------|-------------------------------|----|
| Mixed with normal water          | सामान्य पानी के साथ मिलाकर    | 01 |
| Mixed with warm water            | गुनगुने पानी के साथ मिलाकर    | 02 |
| Mixed with hot water             | गर्म पानी के साथ मिलाकर       | 03 |
| Mixed with normal milk           | सामान्य दूध के साथ मिलाकर     | 04 |
| Mixed with warm milk             | गुनगुने दूध के साथ मिलाकर     | 05 |
| Mixed with hot milk              | गर्म दूध के साथ मिलाकर        | 06 |
| Any other (please specify) _____ | कोई अन्य (कृप्या स्पष्ट करें) |    |

1254-55

- Q312** Please look at this card and tell me, **SHOWCARD Q312** how long back did you buy this packaged infant cereal/ baby food? **SINGLE CODING ONLY**

कृप्या इस कार्ड को देखें और मुझे बताए, कितने समय पहले आपने इस पैकेज्ड शिशु अनाज/ शिशु आहार को खरीदा था ?

|                                           |                                                   |   |
|-------------------------------------------|---------------------------------------------------|---|
| In last 1 week                            | पिछले 1 सप्ताह में                                | 1 |
| In last 2 weeks but not in last 1 week    | पिछले 2 सप्ताह में परन्तु पिछले 1 सप्ताह में नहीं | 2 |
| In last 1 month but not in last 2 weeks   | पिछले 1 महीने में परन्तु पिछले 2 सप्ताह में नहीं  | 3 |
| In last 2 months but not in last 1 month  | पिछले 2 महीनों में परन्तु पिछले 1 महीने में नहीं  | 4 |
| In last 6 months but not in last 2 months | पिछले 6 महीनों में परन्तु पिछले 2 महीनों में नहीं | 5 |
| Before last 6 months                      | पिछले 6 महीनों से पहले                            | 6 |

1256

**Q329** Please look at this card and tell me, **SHOWCARD Q329**, from which place do you purchase this packaged infant cereal/ baby food **most often**? **MULTIPLE CODING POSSIBLE**

कृपया इस कार्ड को देखें और मुझे बताये कि आप किन जगहों से इस पैकेज्ड इनफेंट सीरियल/बेबी फूड को ज्यादातर खरीदती हैं ?

|                                 |                              | Q329 |
|---------------------------------|------------------------------|------|
| Kirana store near the locality  | क्षेत्र के निकट किराना स्टोर | 01   |
| Grocery store/ General merchant | ग्रोसरी स्टोर/ जनरल मर्चेन्ट | 02   |
| Modern format outlet            | आधुनिक फॉर्मेट आउटलेट        | 03   |
| Pharmacy/ Chemist shop          | फार्मसी/ कैमिस्ट शॉप         | 04   |
| From doctor                     | डॉक्टर से                    | 05   |
| Street vendors                  | स्ट्रीट वैंडर्स              | 06   |
| Dairy/ Milk Outlet              | डेयरी/ दूध की दूकान          | 07   |
| Bakery                          | बेकरी                        | 09   |
| Any other (please specify)      | कोई अन्य (कृपया स्पष्ट करें) |      |
| Any other (please specify)      | कोई अन्य (कृपया स्पष्ट करें) |      |

1472-73

**Q313 SHOWCARD Q313** Please tell me why do you serve packaged infant cereal/ baby food to [REFERENT CHILD]? **MULTIPLE CODING POSSIBLE**

कृपया मुझे बताएं आप ..... के लिए पैकेज्ड शिशु अनाज/ शिशु आहार क्यों सर्व करते हैं ?

|                                                                |                                                                  |    |
|----------------------------------------------------------------|------------------------------------------------------------------|----|
| They are healthy for child                                     | यह बच्चों के लिए स्वास्थ्यदायक है                                | 01 |
| The doctor/ health professional recommended this               | डॉक्टर/ स्वास्थ्य पेशेवर ने इसकी सिफारिश की थी                   | 02 |
| My child likes the taste of packaged infant cereal/ baby foods | मेरा बच्चा पैकेज्ड शिशु अनाज/ शिशु आहार के स्वाद को पसंद करता है | 03 |
| My child gets digestive problem after eating other foods       | अन्य खाने के बाद मेरे बच्चे को पाचन की परेशानी हो जाती है        | 04 |
| My child is too young for other foods                          | मेरा बच्चा अन्य आहार के लिए बहुत छोटा है                         | 05 |
| My child is too old for only milk                              | केवल दूध के लिए मेरा बच्चा बहुत बड़ा है                          | 06 |
| I don't prefer homemade cereals                                | मैं होममेड सीरियल को पसंद नहीं करती                              | 07 |
| I don't have time to prepare homemade cereals                  | मेरे पास बच्चे के लिए घर पर बना अनाज बनाने का समय नहीं है        | 08 |
| Any other (please specify)                                     | कोई अन्य (कृपया स्पष्ट करें)                                     |    |
| Any other (please specify)                                     | कोई अन्य (कृपया स्पष्ट करें)                                     |    |

1257-72

- Q314** Please look at this card and tell me, **SHOWCARD Q314** who else in your household consumes the packaged infant cereal/ baby food that is prepared for the kids 6-23 months old. **MULTIPLE CODING POSSIBLE**  
कृपया इस कार्ड को देखे और मुझे बताएं, आपके परिवार में और कौन पैकेज्ड शिशु अनाज/ शिशु आहार को खाता/ पीता है जो कि 6-23 महीने की उम्र के लिए बनाया जाता है।

|                                                                                          |                                                                                         |   |
|------------------------------------------------------------------------------------------|-----------------------------------------------------------------------------------------|---|
| Kids between 2-5 years                                                                   | 2-5 वर्ष के बीच के बच्चे                                                                | 1 |
| Kids between 6-12 years                                                                  | 6-12 वर्ष के बीच के बच्चे                                                               | 2 |
| Kids between 13-17 years                                                                 | 13-17 वर्ष के बीच के बच्चे                                                              | 3 |
| Adults between 18-25 years                                                               | 18-25 वर्ष के बीच के व्यस्क                                                             | 4 |
| Adults between 26-40 years                                                               | 26-40 वर्ष के बीच के व्यस्क                                                             | 5 |
| Adults above 40 years                                                                    | 40 वर्ष से बड़े के व्यस्क                                                               | 6 |
| No one else consumes packaged infant cereal/ baby food prepared for kids 6-23 months old | 6-23 महीने के बच्चों के लिए तैयार पैकेज्ड शिशु अनाज/ शिशु आहार को कोई और नहीं खाता पीता | 9 |

1273-78

- Q315** Thinking about the total packaged infant cereal/ baby food consumed in your household in last 1 week, please divide it among members in your household who consume packaged infant cereal/ baby food as per their share in total quantity consumed. **RECORD VERBATIM FOR EACH MEMBER CODED IN Q314. RECORD VERBATIM FOR THE SELECTED CHILD. RECORD WITH LEADING ZEROES**

पिछले 1 सप्ताह में आपके परिवार में खाए गए कूल पैकेज्ड शिशु अनाज/ शिशु आहार के बारे में सोचते हुए, कृपया इस आपके परिवार में सदस्यों के बीच जो पैकेज्ड शिशु अनाज/ शिशु आहार को खाते हैं खपत की गयी कूल मात्रा में उनके हिस्से के अनुसार बाँटें।

|                            |                             | Post code from Q314 | % Share |         |
|----------------------------|-----------------------------|---------------------|---------|---------|
| Kids between 2-5 years     | 2-5 वर्ष के बीच के बच्चे    | 1                   |         | 1279-81 |
| Kids between 6-12 years    | 6-12 वर्ष के बीच के बच्चे   | 2                   |         | 1282-84 |
| Kids between 13-17 years   | 13-17 वर्ष के बीच के बच्चे  | 3                   |         | 1285-87 |
| Adults between 18-25 years | 18-25 वर्ष के बीच के व्यस्क | 4                   |         | 1288-90 |
| Adults between 26-40 years | 26-40 वर्ष के बीच के व्यस्क | 5                   |         | 1311-13 |
| Adults above 40 years      | 40 वर्ष से बड़े के व्यस्क   | 6                   |         | 1314-16 |
| Kids between 6-23 months   | 6-23 महीने के बच्चे         | 7                   |         | 1317-19 |
|                            |                             |                     | 100%    |         |
| → GO TO Q324               |                             |                     |         |         |

**ASK Q316-Q320 IF PACKAGED INFANT CEREAL (155) NOT CODED IN Q301 (PACKAGED INFANT CEREAL NOT SERVED IN PAST 3 DAYS)**

**CODE RESPONSES FOR Q316- Q317 IN THE GRID GIVEN AFTER Q317**

- Q316 DO NOT EXPOSE THE LIST** Please tell me which brands of packaged infant cereals/ baby foods are you aware of? **MULTIPLE CODING POSSIBLE**

कृपया मुझे बताएं पैकेज्ड शिशु अनाज/ शिशु आहार के किन ब्रांड्स से आप अवगत हैं ?

- Q317** At what price is a pack of packaged infant cereal/ baby food is available in market? Please specify the pack size as well (in gm). **RECORD VERBATIM WITH LEADING ZEROES**

पैकेज्ड शिशु अनाज/ शिशु आहार का पैक बाजार में किस कीमत पर उपलब्ध है ? कृपया पैक साइज को भी स्पष्ट करें।

| Q316                                  |                     |    | Q317.1         | Q317.2            |
|---------------------------------------|---------------------|----|----------------|-------------------|
| DO NOT EXPOSE THE LIST/ DO NOT PROMPT |                     |    | PRICE (in Rs.) | PACK SIZE (in gm) |
| Cerelac                               | सेरेलक              | 01 |                |                   |
| Nestum                                | नेस्टम              | 02 |                |                   |
| Farex                                 | फैरेक्स             | 03 |                |                   |
| Gerber                                | जरबर                | 04 |                |                   |
| Any other _____                       | कोई अन्य            |    |                |                   |
| Any other _____                       | कोई अन्य            |    |                |                   |
| Any other _____                       | कोई अन्य            |    |                |                   |
| Not aware/ Cannot recall              | अवगत नहीं/ याद नहीं | 98 |                |                   |

1320-27

1328-31

1332-35

- Q318** Have you ever served packaged infant cereals/ baby foods to [REFERENT CHILD]? **SINGLE CODING ONLY**  
क्या आपने कभी ..... को पैकेज्ड शिशु अनाज/ शिशु आहार को सर्व किया है ?

|            |   |              |
|------------|---|--------------|
| Yes<br>हाँ | 1 | → GO TO Q321 |
| No<br>नहीं | 2 | → GO TO Q319 |

1336

**ASK Q319/ Q320 IF '2' CODED IN Q318****Q319 SHOWCARD Q319** You said that you never served packaged infant cereals/ baby foods to [REFERENT CHILD].May I know the reason why not? **MULTIPLE CODING POSSIBLE**

आपने बताया कि आपने कभी ..... को लिए पैकेज्ड शिशु अनाज/ शिशु आहार को सर्व नहीं किया। क्या मैं कारण जान सकता हूँ?

|                                                                                               |                                                                                             | Q319 |
|-----------------------------------------------------------------------------------------------|---------------------------------------------------------------------------------------------|------|
| I cannot afford packaged infant cereal/ baby food                                             | मैं पैकेज्ड शिशु अनाज/ शिशु आहार का वहन/ अफोर्ड नहीं कर सकता है                             | 01   |
| It is too expensive as compared to homemade food                                              | यह घर पर बने आहार की तुलना में बहुत महंगा है                                                | 02   |
| There is no small pack to try it and if my child does not eat it, it will be a waste of money | इसे आजमाने के लिए छोटा पैक नहीं है और यदि मेरा बच्चा इसे नहीं खाता, यह पैसे की बर्बादी होगी | 03   |
| It's not healthy for my child                                                                 | यह मेरे बच्चे के लिए स्वास्थ्यदायक नहीं है                                                  | 04   |
| My child doesn't like it                                                                      | मेरा बच्चा इसे पसंद नहीं करता है                                                            | 06   |
| My child is too young for it                                                                  | मेरे बच्चा इसके लिए बहुत छोटा है                                                            | 07   |
| My child is too old for it                                                                    | मेरा बच्चा इसके लिए बहुत बड़ा है                                                            | 08   |
| My child gets digestive problem after eating it                                               | इसे खाने के बाद मेरे बच्चे को पाचक परेशानी हो गयी                                           | 09   |
| Homemade food has much more variety and child requires variety                                | घर पर बने आहार में ज्यादा वैरायटी होती है और बच्चे को वैरायटी चाहिए                         | 12   |
| It does not provide fat                                                                       | यह फैट प्रदान नहीं करता है                                                                  | 13   |
| My mother-in-law/ other family members/ friends are against it                                | मेरी सास/अन्य परिवार के सदस्य/दोस्त इसके विरोध में हैं                                      | 26   |
| The doctor advised me not to feed packaged food to my child                                   | डॉक्टर ने मेरे बच्चे को पैकेज्ड आहार नहीं खिलाने की सलाह दी थी                              | 16   |
| Do not have knowledge about all benefits it provides                                          | इसके द्वारा दिये जाने वाले सभी फायदों के बारे में नहीं जानती                                | 17   |
| It cannot be prepared and kept for a few hours like home food, it has to be eaten immediately | इसे घर पर बने आहार की तरह बनाकर कुछ घंटों के लिए नहीं रखा जा सकता, इसे तुरंत खाना होता है   | 18   |
| It is raw/ it is not made by boiling or cooking the food                                      | यह कच्चा है/ यह खाना को पकाने या उबालने द्वारा नहीं बनाया जाता                              | 19   |
| It may contain preservatives which are harmful                                                | इसमें प्रतिरक्षक/प्रिजर्वेटिव हो सकते हैं जो हानिकारक हैं                                   | 20   |
| The child will not develop habit of eating homemade food for later in life                    | जीवन में बाद के लिए बच्चे में घर पर बने आहार को खाने की आदत विकसित नहीं होगी                | 22   |
| It is very sticky and sticks into the mouth of the child                                      | यह बहुत चिपचिपा है और बच्चे के मुंह में चिपकता है                                           | 24   |
| I feel guilty when I give packaged food to my child                                           | मेरे बच्चे को पैकेज्ड आहार देते समय मैं दोषी महसूस करती हूँ                                 | 25   |
| Not available in the places where I go for shopping                                           | उस जगह पर उपलब्ध नहीं जहाँ से मैं खरीदारी करने के लिए जाती हूँ                              | 05   |
| Any other (please specify) _____                                                              | कोई अन्य (कृपया स्पष्ट करें)                                                                |      |
| Any other (please specify) _____                                                              | कोई अन्य (कृपया स्पष्ट करें)                                                                |      |

1337-58

**Q320** Would you buy packaged infant cereals/ baby foods if you could afford it? **SINGLE CODING ONLY**

क्या आप पैकेज्ड शिशु अनाज/ शिशु आहार को खरीदेंगे यदि आप इसका वहन/ अफोर्ड कर सकते ?

|                                            |    |              |
|--------------------------------------------|----|--------------|
| Yes<br>हाँ                                 | 01 | → GO TO Q324 |
| No<br>नहीं                                 | 02 |              |
| Don't know ( <b>DO NOT READ</b> ) पता नहीं | 98 |              |

1359-60

**ASK Q321 IF '1' CODED IN Q318****Q321** Have you ever bought packaged infant cereals/ baby foods for [REFERENT CHILD]? **SINGLE CODING ONLY**

Assign 10 class-points if YES (circle number):

क्या आपने कभी ..... के लिए पैकेज्ड शिशु अनाज/ शिशु आहार को खरीदा है ?

|                                            |    |              |
|--------------------------------------------|----|--------------|
| Yes<br>हाँ                                 | 01 | → GO TO Q322 |
| No<br>नहीं                                 | 02 | → GO TO Q323 |
| Don't know ( <b>DO NOT READ</b> ) पता नहीं | 98 | → GO TO Q322 |



|      |  |  |
|------|--|--|
| नहीं |  |  |
|------|--|--|

1361-62

**ASK Q322 IF PACKAGED INFANT CEREAL (155) NOT CODED IN Q301 AND '1/'98' CODED IN Q321****Q322 SHOWCARD Q322** Could you please tell me why you do not give packaged infant cereals/ baby foods to [REFERENT CHILD] more often? **MULTIPLE CODING POSSIBLE**

कृपया मुझे बताएं आप ..... के लिए ज्यादातर पैकेज्ड शिशु अनाज/ शिशु खाद्य क्यों नहीं देते हैं ?

|                                                                                               |                                                                                             | Q322 |
|-----------------------------------------------------------------------------------------------|---------------------------------------------------------------------------------------------|------|
| I cannot afford packaged infant cereal/ baby food                                             | मैं पैकेज्ड शिशु अनाज/ शिशु आहार का वहन/ अफोर्ड नहीं कर सकता है                             | 01   |
| It is too expensive as compared to homemade food                                              | यह घर पर बने आहार की तुलना में बहुत महंगा है                                                | 02   |
| There is no small pack to try it and if my child does not eat it, it will be a waste of money | इसे आजमाने के लिए छोटा पैक नहीं है और यदि मेरा बच्चा इसे नहीं खाता, यह पैसे की बर्बादी होगी | 03   |
| It's not healthy for my child                                                                 | यह मेरे बच्चे के लिए स्वास्थ्यदायक नहीं है                                                  | 04   |
| My child doesn't like it                                                                      | मेरा बच्चा इसे पसंद नहीं करता है                                                            | 06   |
| My child is too young for it                                                                  | मेरे बच्चा इसके लिए बहुत छोटा है                                                            | 07   |
| My child is too old for it                                                                    | मेरा बच्चा इसके लिए बहुत बड़ा है                                                            | 08   |
| My child gets digestive problem after eating it                                               | इसे खाने के बाद मेरे बच्चे को पाचक परेशानी हो गयी                                           | 09   |
| Homemade food has much more variety and child requires variety                                | घर पर बने आहार में ज्यादा वैरायटी होती है और बच्चे को वैरायटी चाहिए                         | 12   |
| It does not provide fat                                                                       | यह फैट प्रदान नहीं करता है                                                                  | 13   |
| My mother-in-law/ other family members/ friends are against it                                | मेरी सास/अन्य परिवार के सदस्य/दोस्त इसके विरोध में हैं                                      | 26   |
| The doctor advised me not to feed packaged food to my child                                   | डॉक्टर ने मेरे बच्चे को पैकेज्ड आहार नहीं खिलाने की सलाह दी थी                              | 16   |
| Do not have knowledge about all benefits it provides                                          | इसके द्वारा दिये जाने वाले सभी फायदों के बारे में नहीं जानती                                | 17   |
| It cannot be prepared and kept for a few hours like home food, it has to be eaten immediately | इसे घर पर बने आहार की तरह बनाकर कुछ घंटों के लिए नहीं रखा जा सकता, इसे तुरंत खाना होता है   | 18   |
| It is raw/ it is not made by boiling or cooking the food                                      | यह कच्चा है/ यह खाना को पकाने या उबालने द्वारा नहीं बनाया जाता                              | 19   |
| It may contain preservatives which are harmful                                                | इसमें प्रतिरक्षक/प्रिजर्वेटिव हो सकते हैं जो हानिकारक हैं                                   | 20   |
| The child will not develop habit of eating homemade food for later in life                    | जीवन में बाद के लिए बच्चे में घर पर बने आहार को खाने की आदत विकसित नहीं होगी                | 22   |
| It is very sticky and sticks into the mouth of the child                                      | यह बहुत चिपचिपा है और बच्चे के मुंह में चिपकता है                                           | 24   |
| I feel guilty when I give packaged food to my child                                           | मेरे बच्चे को पैकेज्ड आहार देते समय मैं दोषी महसूस करती हूँ                                 | 25   |
| Not available in the places where I go for shopping                                           | उस जगह पर उपलब्ध नहीं जहां से मैं खरीदारी करने के लिए जाती हूँ                              | 05   |
| Any other (please specify) _____                                                              | कोई अन्य (कृपया स्पष्ट करें)                                                                |      |
| Any other (please specify) _____                                                              | कोई अन्य (कृपया स्पष्ट करें)                                                                |      |
| <b>→ GO TO Q324</b>                                                                           |                                                                                             |      |

1411-30

**ASK Q323 IF PACKAGED INFANT CEREAL (155) NOT CODED IN Q301 AND '2' CODED IN Q321**

**Q323 SHOWCARD Q323** You said that you never bought packaged infant cereals/ baby foods for [REFERENT CHILD]. May I know the reason why not? **MULTIPLE CODING POSSIBLE**  
आपने कहा कि आपने ..... के लिए कभी भी पैकेज्ड शिशु अनाज/ शिशु आहार को नहीं खरीदा है। क्या मैं कारण जान सकता हूँ, क्यों नहीं?

|                                                                                               |                                                                                             | <b>Q323</b> |
|-----------------------------------------------------------------------------------------------|---------------------------------------------------------------------------------------------|-------------|
| I cannot afford packaged infant cereal/ baby food                                             | मैं पैकेज्ड शिशु अनाज/ शिशु आहार का वहन/ अफोर्ड नहीं कर सकता हूँ                            | 01          |
| It is too expensive as compared to homemade food                                              | यह घर पर बने आहार की तुलना में बहुत महंगा है                                                | 02          |
| There is no small pack to try it and if my child does not eat it, it will be a waste of money | इसे आजमाने के लिए छोटा पैक नहीं है और यदि मेरा बच्चा इसे नहीं खाता, यह पैसे की बर्बादी होगी | 03          |
| It's not healthy for my child                                                                 | यह मेरे बच्चे के लिए स्वास्थ्यदायक नहीं है                                                  | 04          |
| My child doesn't like it                                                                      | मेरा बच्चा इसे पसंद नहीं करता है                                                            | 06          |
| My child is too young for it                                                                  | मेरे बच्चा इसके लिए बहुत छोटा है                                                            | 07          |
| My child is too old for it                                                                    | मेरा बच्चा इसके लिए बहुत बड़ा है                                                            | 08          |
| My child gets digestive problem after eating it                                               | इसे खाने के बाद मेरे बच्चे को पाचक परेशानी हो गयी                                           | 09          |
| Homemade food has much more variety and child requires variety                                | घर पर बने आहार में ज्यादा वैरायटी होती है और बच्चे को वैरायटी चाहिए                         | 12          |
| It does not provide fat                                                                       | यह फैट प्रदान नहीं करता है                                                                  | 13          |
| My mother-in-law/ other family members/ friends are against it                                | मेरी सास/अन्य परिवार के सदस्य/दोस्त इसके विरोध में हैं                                      | 26          |
| The doctor advised me not to feed packaged food to my child                                   | डॉक्टर ने मेरे बच्चे को पैकेज्ड आहार नहीं खिलाने की सलाह दी थी                              | 16          |
| Do not have knowledge about all benefits it provides                                          | इसके द्वारा दिये जाने वाले सभी फायदों के बारे में नहीं जानती                                | 17          |
| It cannot be prepared and kept for a few hours like home food, it has to be eaten immediately | इसे घर पर बने आहार की तरह बनाकर कुछ घंटों के लिए नहीं रखा जा सकता, इसे तुरंत खाना होता है   | 18          |
| It is raw/ it is not made by boiling or cooking the food                                      | यह कच्चा है/ यह खाना को पकाने या उबालने द्वारा नहीं बनाया जाता                              | 19          |
| It may contain preservatives which are harmful                                                | इसमें प्रतिरक्षक/प्रिजर्वेटिव हो सकते हैं जो हानिकारक हैं                                   | 20          |
| The child will not develop habit of eating homemade food for later in life                    | जीवन में बाद के लिए बच्चे में घर पर बने आहार को खाने की आदत विकसित नहीं होगी                | 22          |
| It is very sticky and sticks into the mouth of the child                                      | यह बहुत चिपचिपा है और बच्चे के मुंह में चिपकता है                                           | 24          |
| I feel guilty when I give packaged food to my child                                           | मेरे बच्चे को पैकेज्ड आहार देते समय मैं दोषी महसूस करती हूँ                                 | 25          |
| Not available in the places where I go for shopping                                           | उस जगह पर उपलब्ध नहीं जहां से मैं खरीदारी करने के लिए जाती हूँ                              | 05          |
| Any other (please specify)                                                                    | कोई अन्य (कृपया स्पष्ट करें)                                                                |             |
| Any other (please specify)                                                                    | कोई अन्य (कृपया स्पष्ट करें)                                                                |             |

1433-52

**ASK ALL**

**Q324** Please tell me does your household receive packaged infant cereals/ baby foods from social programs? **SINGLE CODING ONLY**

कृपया मुझे बताएं क्या आपका परिवार किसी समाजिक प्रोग्राम से पैकेज्ड शिशु अनाज/ शिशु आहार को प्राप्त करता है ?

*There are various food related social programs run by government or any social organization. Under these programs, food is provided to a household directly or indirectly generally either at no cost or at subsidized cost. Some examples of such programs are ration programs, school feeding programs, cash transfers for food etc.*

*सरकार या अन्य समाजिक संगठनों द्वारा विभिन्न खाद्य संबंधित समाजिक कार्यक्रम चलाए जा रहे हैं। इन प्रोग्राम के अंतर्गत खाना सीधे एक परिवार को या बिना किसी लागत या कम की गयी कीमत पर परिवारों को दिया जाता है। ऐसे प्रोग्रामों के कुछ उदाहरण हैं राशन प्रोग्राम, स्कूल आहार प्रोग्राम, आहार के लिए नगद हस्तांतरण इत्यादि।*

|         |   |              |
|---------|---|--------------|
| Yes हाँ | 1 | → GO TO Q325 |
| No नहीं | 2 | → GO TO Q400 |

1363

**ASK Q325 IF '1'/'YES' CODED IN Q324**

**Q325** From which program did you receive the packaged infant cereals/ baby foods you gave to [REFERENT CHILD]? **RECORD VERBATIM**

किस प्रोग्राम से आपने ..... को देने के लिए पैकेज्ड शिशु अनाज/ शिशु आहार को प्राप्त किया था ?

|  |  |  |  |
|--|--|--|--|
|  |  |  |  |
|  |  |  |  |
|  |  |  |  |
|  |  |  |  |
|  |  |  |  |
|  |  |  |  |

1364-72

**PRICE SENSITIVITY SECTION**

**TO NON BUYERS ASK ONLY APPROACH 2**

**FOR CURRENT BUYERS, SELECT FROM RANDOM LIST WHETHER APPROACH 1 OR APPROACH 2 COMES FIRST**

**Q400 SELECT APPROACH THAT COMES FIRST FROM RANDOM LIST**

| <b>GRID ONLY FOR CURRENT BUYERS</b>                                            |                               |                               |   |      |
|--------------------------------------------------------------------------------|-------------------------------|-------------------------------|---|------|
| <b>PRICING APPROACH PANELS (SINGLE CODING ONLY) See number on RANDOM LIST.</b> |                               |                               |   |      |
|                                                                                | <b>ASKED FIRST</b>            | <b>ASKED SECOND</b>           |   |      |
| <b>Panel 1</b>                                                                 | Approach 1<br>(start at Q401) | Approach 2<br>(start at Q420) | 1 | 1477 |
| <b>Panel 2</b>                                                                 | Approach 2<br>(start at Q420) | Approach 1<br>(start at Q401) | 2 |      |

**APPROACH 1**

**ASK Q401-Q415 TO CURRENT BUYERS**

**DETERMINE CURRENT BRAND**

Brand (Q307a): \_\_\_\_\_

Pack Type (Pack type of brand coded in Q307a): \_\_\_\_\_

Pack Size (Pack size of brand coded in Q307a): \_\_\_\_\_

**Q401** You mentioned that you serve [BRAND, PACK TYPE AND PACK SIZE] most often to your child. Please tell me at what price do you buy each pack of this brand, pack type and size? **RECORD VERBATIM WITH LEADING ZEROES**  
आपने बताया कि आपके बच्चे के लिए आप ज्यादातर ..... सर्व करती है। कृपया मुझे बताएं आप इस ब्रांड, पैक प्रकार और साइज के प्रत्येक पैक को किस कीमत पर खरीदती हैं ?

|                                               |  |  |  |  |         |
|-----------------------------------------------|--|--|--|--|---------|
| <b>PRICE OF MOST OFTEN USED PACK (in Rs.)</b> |  |  |  |  | 1478-81 |
|-----------------------------------------------|--|--|--|--|---------|

**Q402** How many packs of [BRAND, PACK TYPE AND PACK SIZE] do you buy in a usual shopping trip? **RECORD VERBATIM WITH LEADING ZEROES**  
..... के कितने पैक्स को आप सामान्य खरीदारी में खरीदती हैं ?

|                                          |  |  |         |
|------------------------------------------|--|--|---------|
| <b>NUMBER OF PACKS PER SHOPPING TRIP</b> |  |  | 1482-83 |
|------------------------------------------|--|--|---------|

**Q403** How often do you make such shopping trips? **RECORD VERBATIM WITH LEADING ZEROES FOR NUMBER OF DAYS BETWEEN SHOPPING TRIPS**  
आप ऐसी खरीदारी कितनी बार करती हैं ?

|                                              |  |  |         |
|----------------------------------------------|--|--|---------|
| <b>NUMBER OF DAYS BETWEEN SHOPPING TRIPS</b> |  |  | 1484-85 |
|----------------------------------------------|--|--|---------|

**Q404 Select % DISCOUNT from RANDOM LIST**

|                                |                    |
|--------------------------------|--------------------|
| <b>Discount in RANDOM LIST</b> | <b>SINGLE CODE</b> |
|--------------------------------|--------------------|

|     |   |
|-----|---|
| 20% | 1 |
| 40% | 2 |
| 60% | 3 |
| 80% | 4 |

1486

**Q405 COMPUTE DISCOUNTED PRICE:**

| DISCOUNT SELECTED                | 1              | 2              | 3              | 4              |                  |
|----------------------------------|----------------|----------------|----------------|----------------|------------------|
| Brand _____                      | DISCOUNT - 20% | DISCOUNT - 40% | DISCOUNT - 60% | DISCOUNT - 80% | DISCOUNTED PRICE |
| Price Paid per Pack (Q401) _____ | ___ x 0.8      | ___ x 0.6      | ___ x 0.4      | ___ x 0.2      |                  |

1511-16

**EXAMPLE FOR COMPUTING DISCOUNTED PRICE:**

Brand – Cerelac – 1000 gram

Price paid per pack – Rs. 365

Discount Selected – '2'/ Discount 40%

DISCOUNTED PRICE = 365 x 0.6  
= Rs. 219

| DISCOUNT SELECTED                         | 1              | 2              | 3              | 4              |                  |
|-------------------------------------------|----------------|----------------|----------------|----------------|------------------|
| Brand <u>Cerelac 1000 gm</u>              | DISCOUNT - 20% | DISCOUNT - 40% | DISCOUNT - 60% | DISCOUNT - 80% | DISCOUNTED PRICE |
| Price Paid per Pack (Q401) <u>Rs. 365</u> | ___ x 0.8      | ___ x 0.6      | ___ x 0.4      | ___ x 0.2      | Rs. 219          |

**ASK Q406- 415 FOR DISCOUNTED PRICE**

**SAY:** We are interested in finding out how much packaged infant cereal/ baby food you would buy at a lower price. This lower price would be a permanently lower price and not just a temporary promotion price. At this price, product is going to be regularly available in the market

हम यह पता लगाने में दिलचस्प हैं कि आप कम कीमत पर कितना पैकेज्ड शिशु अनाज/ शिशु आहार खरीदेंगे। कम कीमत स्थायी कम कीमत होगी और एक अस्थायी प्रमोशन कीमत नहीं। इस कीमत पर, प्रोडक्ट बाजार में नियमित रूप से उपलब्ध होगा।

**Q406 SHOWCARD 406** please give me your opinion on value for money of this packaged infant cereal/ baby food if one package of this was available at [DISCOUNTED PRICE]? **SINGLE CODING ONLY**

कृपया मुझे इस पैकेज्ड शिशु अनाज/ शिशु आहार की कीमत के लिए वसुली पर अपनी राय दें यदि इसका एक पैकेज ..... पर उपलब्ध था ?

|                          |            |    |
|--------------------------|------------|----|
| Excellent                | सर्वोत्तम  | 05 |
| Very good                | बहुत अच्छा | 04 |
| Good                     | अच्छा      | 03 |
| Fair                     | ठीक        | 02 |
| Poor                     | खराब       | 01 |
| Don't know (DO NOT SHOW) | पता नहीं   | 98 |

1517-18

**Q407 SHOWCARD 407** please give tell me how willing are you to buy this packaged infant cereal/ baby food in future if one package of this was available at [DISCOUNTED PRICE]? **SINGLE CODING ONLY**

कृपया मुझे बताएं आपकी भविष्य में इस पैकेज्ड शिशु अनाज/ शिशु आहार को खरीदने की कितनी संभावना है यदि इसका एक पैकेज ..... पर उपलब्ध हो ?

|                          |                              |    |                      |
|--------------------------|------------------------------|----|----------------------|
| Will definitely buy      | निश्चित रूप से खरीदेंगे      | 05 | → GO TO 408          |
| Will probably buy        | शायद खरीदेंगे                | 04 |                      |
| May or may not buy       | खरीद भी सकते हैं या नहीं भी  | 03 |                      |
| Will probably not buy    | शायद नहीं खरीदेंगे           | 02 |                      |
| Will definitely not buy  | निश्चित रूप से नहीं खरीदेंगे | 01 | → GO TO 501 OR APP 2 |
| Don't know (DO NOT SHOW) | पता नहीं                     | 98 | → GO TO 408          |

1519-20

**ASK Q408 IF CODED '2'/'3'/'4'/'5'/'98' CODED IN Q407**

**Q408** How many packs of [BRAND NAME, PACK TYPE AND PACK SIZE] would you buy in a usual shopping trip if the price of a package was [DISCOUNTED PRICE]? **RECORD VERBATIM WITH LEADING ZEROES**

..... के कितने पैक्स को आप सामान्य खरीदारी में खरीदेंगे यदि पैकेज की कीमत .  
..... हो ?

|                                              |  |  |         |
|----------------------------------------------|--|--|---------|
| <b>NUMBER OF PACKS<br/>PER SHOPPING TRIP</b> |  |  | 1521-22 |
|----------------------------------------------|--|--|---------|

**Q409** How often would you make such shopping trips? **RECORD VERBATIM WITH LEADING ZEROES FOR NUMBER OF DAYS BETWEEN SHOPPING TRIPS**

आप ऐसी खरीदारी कितनी बार करेंगी ?

|                                                  |  |  |         |
|--------------------------------------------------|--|--|---------|
| <b>NUMBER OF DAYS BETWEEN<br/>SHOPPING TRIPS</b> |  |  | 1523-24 |
|--------------------------------------------------|--|--|---------|

**Q410** Will you serve more packaged infant cereal/ baby food as a result of this lower price or will consumption remain the same? **SINGLE CODING ONLY**

क्या आप कम कीमत के परिणाम स्वरूप ज्यादा पैकेज्ड शिशु अनाज/ शिशु आहार को सर्व करेंगी या खपत समान रहेगी ?

|                                                                                  |                                                                  |    |                      |
|----------------------------------------------------------------------------------|------------------------------------------------------------------|----|----------------------|
| Yes, will serve more packaged infant cereal                                      | हाँ, ज्यादा पैकेज्ड शिशु अनाज सर्व करेंगे                        | 01 | → GO TO 411          |
| No, will NOT serve more packaged infant cereal/ Consumption will remain the same | नहीं, पैकेज्ड शिशु अनाज ज्यादा सर्व नहीं करेंगे / खपत समान रहेगी | 02 | → GO TO 501 OR APP 2 |
| Don't know ( <b>DO NOT SHOW</b> )                                                | पता नहीं                                                         | 98 | → GO TO 411          |

1525-26

**ASK Q411 IF CODED '1' IN Q410**

**Q411 SHOWCARD Q411** If you will serve more packaged infant cereal/ baby food that you currently do, who would consume the ADDITIONAL packaged infant cereal/ baby food? **SINGLE CODING ONLY**

यदि आप वर्तमान से ज्यादा पैकेज्ड शिशु अनाज/ शिशु आहार को सर्व करेंगी, तो कौन अतिरिक्त पैकेज्ड शिशु अनाज/ शिशु आहार को खाएगा ?

|                                               |                                        |    |                      |
|-----------------------------------------------|----------------------------------------|----|----------------------|
| Equally distributed among adults and children | व्यस्क और बच्चों के बीच बराबर बांटा था | 01 | → GO TO 412          |
| Only adults                                   | केवल व्यस्क                            | 02 | → GO TO 501 OR APP 2 |
| Mainly adults                                 | मुख्य रूप से व्यस्क                    | 03 |                      |
| Mainly children                               | मुख्य रूप से बच्चे                     | 04 |                      |
| Only child/ children                          | केवल बच्चा/ बच्चे                      | 05 | → GO TO 412          |
| Don't know ( <b>DO NOT SHOW</b> )             | पता नहीं                               | 98 | → GO TO 501 OR APP 2 |

1527-28

**ASK Q412 IF '1'/'4'/'5' CODED IN Q411**

**Q412 SHOWCARD Q412** How will the ADDITIONAL packaged infant cereal/ baby food be distributed among the children? **SINGLE CODING ONLY**

अतिरिक्त पैकेज्ड शिशु अनाज/ शिशु आहार को बच्चों के बीच कैसे बटवारा किया जाएगा ?

**IF ONLY 1 CHILD IN THE FAMILY, AUTOCODE '2'**

|                                        |                                  |    |                      |
|----------------------------------------|----------------------------------|----|----------------------|
| Equally distributed among all children | सभी बच्चों के बीच बराबर बांटा था | 01 | → GO TO 413          |
| Only [REFERENT CHILD]                  | केवल .....                       | 02 |                      |
| Mainly [REFERENT CHILD]                | मुख्य रूप से .....               | 03 |                      |
| Mainly the other children              | मुख्य रूप से अन्य बच्चे          | 04 |                      |
| Only the other children                | केवल अन्य बच्चे                  | 05 | → GO TO 501 OR APP 2 |
| Don't know ( <b>DO NOT SHOW</b> )      | पता नहीं                         | 98 | → GO TO 413          |

1529-30

**ASK Q413 IF '1'/'2'/'3'/'4'/'98' CODED IN Q412**

**Q413** Would you feed less of other food and drinks for [REFERENT CHILD]? **SINGLE CODING ONLY**

क्या आप ..... को अन्य आहार और ड्रिंक्स कम खिलायेंगे/ पिलायेंगे ?

|                                            |    |                      |
|--------------------------------------------|----|----------------------|
| Yes हाँ                                    | 1  | → GO TO 414          |
| No नहीं                                    | 2  | → GO TO 501 OR APP 2 |
| Don't know ( <b>DO NOT SHOW</b> ) पता नहीं | 98 |                      |

1531

**ASK Q414 IF '1' / 'YES' CODED IN Q413**

**Q414 SHOWCARD Q414** What kind of food and drinks would you feed less to [REFERENT CHILD]? **MULTIPLE CODING POSSIBLE**

आप ..... के लिए किस प्रकार के आहार और ड्रिंक्स को कम खिलायेंगे/ पिलायेंगे ?

|                                                    |                                             |    |
|----------------------------------------------------|---------------------------------------------|----|
| <b>Breast Milk</b>                                 | माँ का दूध                                  | 01 |
| Cereals like Daliya/ Khichdi/ Mixed Grains/ Sewiya | सीरियल्स जैसे दलिया/खिचड़ी/मिले अनाज/सेवईया | 02 |
| Cereals like Ragi/ Barley/ Bajra/ Maize/ Corn      | सीरियल्स जैसे रागी/जौ/बाजरा/मक्का/दाना      | 03 |
| Oats/ Corn flakes/ Rice flakes                     | ओट्स/ कोर्नफ्लेक्स/ चावल के फ्लेक्स         | 04 |

|                                                                                                                             |                                                                                                                              |    |
|-----------------------------------------------------------------------------------------------------------------------------|------------------------------------------------------------------------------------------------------------------------------|----|
| Rice/ Rice based dishes                                                                                                     | चावल/ चावल से बने व्यंजन                                                                                                     | 05 |
| Packaged Infant Cereals                                                                                                     | पैकेज्ड इनफेंट सीरियल्स/ बेबी फूड                                                                                            | 06 |
| Legumes like pulses, chana etc.                                                                                             | फली जैसे दालें, चना आदि                                                                                                      | 07 |
| Roti, Paratha, Bread, Dosa, Poori etc.                                                                                      | रोटी, पराठा, ब्रेड, डोसा, पूरी आदि                                                                                           | 08 |
| Packaged Powdered Milk                                                                                                      | पैकेज्ड पाउडर्ड दूध                                                                                                          | 09 |
| Homemade Snacks like poha, semolina/ suji/ rawa, halwa, upma, idli, puffed rice, Idiyappam, sattu, chattuah, sabudana etc.  | घर में बने स्नेक्स जैसे पोहा, सेमोलिना/सूजी/रवा, हलवा, उपमा, इडली, फूले चावल, इडियापन, सत्तू, छत्तूआ, साबुदाना आदि           | 10 |
| Cow milk/ buffalo milk (packaged or loose)                                                                                  | गाय का दूध/भैंस का दूध (पैकेज्ड या खुला)                                                                                     | 11 |
| Milk products like curd, raita, lassi/ chaach, cream, tea, coffee, paneer, khoya, shakes, ice cream etc                     | दूध के प्रोडक्ट्स जैसे दही, रायता, लस्सी/छाछ, क्रीम, चाय, कॉफी, पनीर, खोवा, शेक्स, आईसक्रीम आदि.                             | 12 |
| Non vegetarian foods and non veg soups                                                                                      | माँसाहारी खाने और माँसाहारी सूप्स                                                                                            | 13 |
| Infant formulas                                                                                                             | इनफेंट फार्मूला                                                                                                              | 14 |
| Fruits/ Fruit Juices/ Neembu pani                                                                                           | फल/ फलों के जूस/ नींबू पानी                                                                                                  | 15 |
| Packaged snacks/ foods like biscuits, chips, soft drinks, confectionary items, namkeens, milk additives likes Horlicks etc. | पैकेज्ड स्नेक्स/फूड्स जैसे बिस्कुट्स, चिप्स, सॉफ्ट ड्रिंक्स, कॉन्फेक्शनरी सामग्रियाँ, नमकींस, दूध एडीटिव्स जैसे हॉरलिक्स आदि | 16 |
| Vegetables and vegetable soups                                                                                              | सब्जियाँ और सब्जियों के सूप्स                                                                                                | 17 |
| Any other _____<br>कोई अन्य                                                                                                 |                                                                                                                              |    |
| Any other _____<br>कोई अन्य                                                                                                 |                                                                                                                              |    |
| Don't know/Don't remember (DON'T SHOW/ READ)<br>पता नहीं/याद नहीं                                                           |                                                                                                                              | 98 |

1532-47

**Q415** Please tell me whether you would buy less of other brands of packaged infant cereals/ baby food that you buy regularly? **MULTIPLE CODING POSSIBLE**

कृपया मुझे बताए क्या आप पैकेज्ड शिशु अनाज/ शिशु आहार के अन्य ब्रांड्स को कम खरीदेंगे जो कि आप नियमित रूप से खरीदते हैं ?

|                                                                    | BRANDS CODED IN Q304 |         |
|--------------------------------------------------------------------|----------------------|---------|
| Brand 1 (Specify Name)<br>ब्रांड 1 (नाम स्पष्ट करे)                | 1                    | 1548-50 |
| Brand 2 (Specify Name)<br>ब्रांड 2 (नाम स्पष्ट करे)                | 2                    | 1551-53 |
| Brand 3 (Specify Name)<br>ब्रांड 3 (नाम स्पष्ट करे)                | 3                    | 1554-56 |
| Brand 4 (Specify Name)<br>ब्रांड 4 (नाम स्पष्ट करे)                | 4                    | 1557-59 |
| Brand 5 (Specify Name)<br>ब्रांड 5 (नाम स्पष्ट करे)                | 5                    | 1560-62 |
| Will not reduce for any brand<br>किसी ब्रांड के लिए कम नहीं करेंगे | 9                    | 1563    |
| <b>→ GO TO 501 OR APP 2</b>                                        |                      |         |

## APPROACH 2- ASK ALL

**SAY:** Suppose you were eligible for a program allowing you, as the mother of a child aged 6-23 months old, to buy packaged infant cereal/ baby food at a reduced price. Each pack of this special infant cereal for children 6-23 months of age would be sufficient to prepare 1 serving of cereals for [REFERENT CHILD]. The required daily amount of this infant cereal is 2 servings per day i.e. 2 packs per day.

**कहे:** कल्पना करे आप एक प्रोग्राम के लिए योग्य है जो आपको 6-23 महीनो की उम्र के बच्चे की माँ के रूप में, पैकेज्ड शिशु अनाज/ शिशु आहार एक कम की गयी कीमत पर खरीदने की अनुमति देता है। इस विशेष शिशु अनाज का प्रत्येक पैक 6-23 महीनो की उम्र के बच्चे के लिए प्रति दिन अनाज की 1 सर्विंग बनाने के लिए पर्याप्त होगा। इस शिशु अनाज की प्रति दिन की ज़रूरी मात्रा प्रति दिन 2 सर्विंग है मतलब प्रति दिन 2 पैक।

Please note that this product is not a substitute for breastfeeding and that [REFERENT CHILD] will still require other food items along with this.

कृपया ध्यान रहे कि यह प्रोडक्ट स्तनपान का विकल्प नहीं है और ..... को इसके साथ अन्य खाने की सामग्रियों की जरूरत होगी।

This special price would be a permanently lower price and not just a temporary promotion price. At this price, the product is going to be regularly available in the market.

यह विशेष कीमत स्थायी रूप से कम कीमत होगी और केवल एक अस्थायी कीमत नहीं होगी। इस कीमत पर, प्रोडक्ट नियमित रूप से बाजार में उपलब्ध होगा।

According to the programme (child 6-23 months of age) should be fed with 2 packages per day until she/ he reaches the age of 2 years. Please note that this packaged infant cereal/ baby food is for children 6 months to less than 2 years old only and is not advisable to be served to others not within this age range.

प्रोग्राम के अनुसार 6-23 महीने की उम्र के बच्चे को प्रतिदिन 2 पैकेज खिलाना चाहिए जब तक वह 2 वर्ष की उम्र तक नहीं पहुंचे। कृपया याद रखें कि यह पैकेज्ड शिशु अनाज/ शिशु आहार केवल 6 महीनो से 2 वर्ष से कम उम्र के बच्चे के लिए है और इस रेंज के बाहर के अन्य को सर्व करने के लिए नहीं है।

We are interested in finding out how much of this packaged infant cereal/ baby food you would buy.

हम यह पता लगाने में दिलचस्प है आप इस पैकेज्ड शिशु अनाज/ शिशु आहार को कितना खरीदेंगे।

### EXPOSE CONCEPT CARD AND DEBRANDED PACKS

**Q420** Select **START\_PRICE\_2** from **RANDOM LIST**. **START WITH THAT PRICE**

| SINGLE CODING ONLY |        |       |       |       |
|--------------------|--------|-------|-------|-------|
| P1                 | P2     | P3    | P4    | P5    |
| Rs. 14             | Rs. 11 | Rs. 8 | Rs. 5 | Rs. 2 |
| 1                  | 2      | 3     | 4     | 5     |

1564

**Q421** Would you buy this packaged infant cereal/ baby food if the price of 1 package was [MENTION PRICE]? **SINGLE CODING ONLY**

क्या आप इस शिशु अनाज/ शिशु आहार को खरीदेंगे यदि 1 पैकेज की कीमत ..... हो ।

|                                   |    |             |
|-----------------------------------|----|-------------|
| Yes हाँ                           | 1  | → GO TO 423 |
| No नहीं                           | 2  | → GO TO 422 |
| Don't know (DO NOT SHOW) पता नहीं | 98 |             |

1565-66

**Q422** Would you buy this packaged infant cereal/ baby food if the price of 1 package was [NEXT LOWER PRICE]? If "NO" **CONTINUE TO NEXT LOWER PRICE UNTIL LOWEST PRICE. SINGLE CODING ONLY**

क्या आप इस शिशु अनाज/ शिशु आहार को खरीदेंगे यदि 1 पैकेज की कीमत ..... हो ।

|                                                        |             |        |       |       |       |             |
|--------------------------------------------------------|-------------|--------|-------|-------|-------|-------------|
| <b>CIRCLE THE STARTING PRICE</b>                       | 1           | 2      | 3     | 4     | 5     |             |
| <b>= NEXT LOWER PRICE TO START_PRICE_2</b>             | Rs. 14      | Rs. 11 | Rs. 8 | Rs. 5 | Rs. 2 |             |
| <b>CIRCLE THE PRICE AT WHICH RESPONDENT SAID 'YES'</b> | 1           | 2      | 3     | 4     | 5     | None - 9    |
|                                                        | → GO TO 423 |        |       |       |       | → GO TO 431 |

1567

**ASK Q423 FOR PRICE FOR WHICH '1'/'YES' CODED IN Q421 OR Q422 = BUY PRICE 2**

WRITE "BUY PRICE 2 INTO BOX:

1568-69

**Q423** Would you feed less of other food and drinks for [REFERENT CHILD]? **SINGLE CODING ONLY**  
क्या आप ..... को अन्य आहार और ड्रिंक्स कम खिलायेंगे/ पिलायेंगे ?

|                                   |    |             |
|-----------------------------------|----|-------------|
| Yes हाँ                           | 1  | → GO TO 424 |
| No नहीं                           | 2  | → GO TO 425 |
| Don't know (DO NOT SHOW) पता नहीं | 98 |             |

1570-71

**ASK Q424 IF '1' CODED IN Q423**

**Q424 SHOWCARD Q424** What kind of food and drinks would you feed less to [REFERENT CHILD]? **MULTIPLE CODING POSSIBLE**

आप ..... को किस प्रकार का आहार और ड्रिंक्स कम खिलायेंगे/ पिलायेंगे ?

|                                                                                                                                    |                                                                                                                             |    |
|------------------------------------------------------------------------------------------------------------------------------------|-----------------------------------------------------------------------------------------------------------------------------|----|
| <b>Breast Milk</b>                                                                                                                 | माँ का दूध                                                                                                                  | 01 |
| Cereals like <b>Daliya/ Khichdi/ Mixed Grains/ Sewiya</b>                                                                          | सीरियल्स जैसे दलिया/खिचड़ी/मिले अनाज/सेवईया                                                                                 | 02 |
| Cereals like <b>Ragi/ Barley/ Bajra/ Maize/ Corn</b>                                                                               | सीरियल्स जैसे रागी/जौ/बाजरा/मक्का/दाना                                                                                      | 03 |
| <b>Oats/ Corn flakes/ Rice flakes</b>                                                                                              | ओट्स/ कोर्नफ्लेक्स/ चावल के फ्लेक्स                                                                                         | 04 |
| <b>Rice/ Rice based dishes</b>                                                                                                     | चावल/ चावल से बने व्यंजन                                                                                                    | 05 |
| <b>Packaged Infant Cereals</b>                                                                                                     | पैकेज्ड इनफेंट सीरियल्स/ बेबी फूड                                                                                           | 06 |
| <b>Legumes</b> like pulses, chana etc.                                                                                             | फली जैसे दालें, चना आदि                                                                                                     | 07 |
| <b>Roti, Paratha, Bread, Dosa, Poori etc.</b>                                                                                      | रोटी, पराठा, ब्रेड, डोसा, पूरी आदि                                                                                          | 08 |
| <b>Packaged Powdered Milk</b>                                                                                                      | पैकेज्ड पाउडर्ड दूध                                                                                                         | 09 |
| <b>Homemade Snacks</b> like poha, semolina/ suji/ rawa, halwa, upma, idli, puffed rice, Idiyappam, sattu, chattuah, sabudana etc.  | घर में बने स्नेक्स जैसे पोहा, सेमोलिना/सूजी/रवा, हलवा, उपमा, इडली, फूले चावल, इडियापन, सत्तू, छतूआ, साबुदाना आदि            | 10 |
| <b>Cow milk/ buffalo milk (packaged or loose)</b>                                                                                  | गाय का दूध/भैंस का दूध (पैकेज्ड या खुला)                                                                                    | 11 |
| <b>Milk products</b> like curd, raita, lassi/ chaach, cream, tea, coffee, paneer, khoya, shakes, ice cream etc                     | दूध के प्रोडक्ट्स जैसे दही, रायता, लस्सी/छाछ, क्रीम, चाय, कॉफी, पनीर, खोवा, शेक्स, आईसक्रीम आदि.                            | 12 |
| <b>Non vegetarian foods and non veg soups</b>                                                                                      | माँसाहारी खाने और माँसाहारी सूप्स                                                                                           | 13 |
| <b>Infant formulas</b>                                                                                                             | इनफेंट फार्मूला                                                                                                             | 14 |
| <b>Fruits/ Fruit Juices/ Neembu pani</b>                                                                                           | फल/ फलों के जूस/ नींबू पानी                                                                                                 | 15 |
| <b>Packaged snacks/ foods</b> like biscuits, chips, soft drinks, confectionary items, namkeens, milk additives likes Horlicks etc. | पैकेज्ड स्नेक्स/फूड्स जैसे बिस्कुट्स, चिप्स, सॉफ्ट ड्रिंक्स, कॉन्फेक्शनरी सामग्रियाँ, नमकीस, दूध एडीटिव्स जैसे हॉरलिक्स आदि | 16 |
| <b>Vegetables and vegetable soups</b>                                                                                              | सब्जियाँ और सब्जियों के सूप्स                                                                                               | 17 |
| <b>Any other</b> _____<br>कोई अन्य                                                                                                 |                                                                                                                             |    |
| <b>Any other</b> _____<br>कोई अन्य                                                                                                 |                                                                                                                             |    |
| Don't know/Don't remember (DON'T SHOW/ READ)<br>पता नहीं/याद नहीं                                                                  |                                                                                                                             | 98 |

1572-87

**Q425 SHOWCARD Q425** Who in your household would consume the packaged infant cereal/ baby food? **SINGLE CODING ONLY**

आपके परिवार में कौन पैकेज्ड शिशु अनाज/ शिशु आहार को खायेंगा ?

|                                               |                                      |    |             |
|-----------------------------------------------|--------------------------------------|----|-------------|
| Equally distributed among adults and children | व्यस्क और बच्चों के बीच बराबर बांटना | 01 | → GO TO 426 |
| Only adults                                   | केवल व्यस्क                          | 02 | → GO TO 427 |
| Mainly adults                                 | मुख्य रूप से व्यस्क                  | 03 |             |
| Mainly children                               | मुख्य रूप से बच्चे                   | 04 | → GO TO 426 |
| Only child/ children                          | केवल बच्चा/ बच्चे                    | 05 |             |
| Don't know (DO NOT SHOW)                      | पता नहीं                             | 98 | → GO TO 427 |

1611-12

**ASK Q426 IF '1'/'4'/'5' CODED IN Q425**

**Q426 SHOWCARD Q426** How will the packaged infant cereal/ baby food be distributed among the children? **SINGLE CODING ONLY**

बच्चों के बीच पैकेज्ड शिशु अनाज/ शिशु आहार को कैसे बटवारा किया जाएगा ?

IF ONLY 1 CHILD IN THE FAMILY, AUTOCODE '2'

|                                        |                                |    |
|----------------------------------------|--------------------------------|----|
| Equally distributed among all children | सभी बच्चों के बीच बराबर बांटना | 01 |
|----------------------------------------|--------------------------------|----|



|                           |                         |    |
|---------------------------|-------------------------|----|
| Only [REFERENT CHILD]     | केवल .....              | 02 |
| Mainly [REFERENT CHILD]   | मुख्य रूप से .....      | 03 |
| Mainly the other children | मुख्य रूप से अन्य बच्चे | 04 |
| Only the other children   | केवल अन्य बच्चे         | 05 |
| Don't know (DO NOT SHOW)  | पता नहीं                | 98 |

1613-14

**ASK ALL**

**Q427 SHOWCARD Q427** please give me your opinion on value for money of this packaged infant cereal/ baby food if one package of this was available at (PRICE\_BUY\_2)? **SINGLE CODING ONLY**

कृपया मुझे इस पैकेज्ड शिशु अनाज/ शिशु आहार की वस्तु के लिए वसुली पर अपनी राय दे यदि इसका एक पैकेज ..... पर उपलब्ध था ?

|                          |            |    |
|--------------------------|------------|----|
| Excellent                | सर्वोत्तम  | 05 |
| Very good                | बहुत अच्छा | 04 |
| Good                     | अच्छा      | 03 |
| Fair                     | ठीक        | 02 |
| Poor                     | खराब       | 01 |
| Don't know (DO NOT SHOW) | पता नहीं   | 98 |

1615-16

**Q428 SHOWCARD 428** please tell me how willing are you to buy this packaged infant cereal/ baby food in future if one package of this was available at (PRICE\_BUY\_2)? **SINGLE CODING ONLY**

कृपया मुझे बताएं आपकी भविष्य में इस पैकेज्ड शिशु अनाज/ शिशु आहार को खरीदने की कितनी संभावना है यदि इसका एक पैकेज ..... पर उपलब्ध हो ?

|                          |                              |    |                                                                                          |
|--------------------------|------------------------------|----|------------------------------------------------------------------------------------------|
| Will definitely buy      | निश्चित रूप से खरीदेंगे      | 05 | <b>→ GO TO 429</b>                                                                       |
| Will probably buy        | शायद खरीदेंगे                | 04 |                                                                                          |
| May or may not buy       | खरीद भी सकते हैं या नहीं भी  | 03 |                                                                                          |
| Will probably not buy    | शायद नहीं खरीदेंगे           | 02 |                                                                                          |
| Will definitely not buy  | निश्चित रूप से नहीं खरीदेंगे | 01 | <b>→ GO TO APPROACH 1 IF CURRENT BUYER AND APPROACH 1 NOT YET DONE - ELSE GO TO Q501</b> |
| Don't know (DO NOT SHOW) | पता नहीं                     | 98 |                                                                                          |

1617-18

**ASK Q429 IF CODED '5'/'4'/'3'/'2' IN Q428**

**Q429** How many packs of [CONTROL PACK] would you buy in a week? **RECORD VERBATIM WITH LEADING ZEROES**  
आप एक सप्ताह में ..... के कितने पैक्स को खरीदेंगे ?

|                                 |  |  |
|---------------------------------|--|--|
| <b>NUMBER OF PACKS PER WEEK</b> |  |  |
|---------------------------------|--|--|

1619-20

**Q430** How many servings of [CONTROL PACK] would you give to [REFERENT CHILD] in a week? **RECORD VERBATIM WITH LEADING ZEROES**

आप एक सप्ताह में ..... को ..... की कितनी सर्विंग देंगे ?

|                                    |  |  |
|------------------------------------|--|--|
| <b>NUMBER OF SERVINGS PER WEEK</b> |  |  |
|------------------------------------|--|--|

1621-22

**ASK Q431 IF CODED '9' IN Q422**

**Q431** Would you feed [CONTROL PACK] to [REFERENT CHILD] if you would receive [CONTROL PACK] for FREE? **SINGLE CODING ONLY**

अगर आप को ..... मुफ्त में मिले तो क्या आप ..... को यह देंगे ?

|                                      |    |
|--------------------------------------|----|
| Yes<br>हाँ                           | 01 |
| No<br>नहीं                           | 02 |
| Don't know (DO NOT SHOW)<br>पता नहीं | 98 |

1673-74

**→ GO TO APPROACH 1 IF CURRENT BUYER AND APPROACH 1 NOT YET DONE**

→ ELSE GO Q501

**ATTITUDES SECTION**

- Q501** Did you receive any advice on which type of foods/ drinks you should give to your child? **SINGLE CODING ONLY**  
क्या आपने कोई सलाह प्राप्त की थी कि आपके बच्चे के लिए किस प्रकार का आहार/ ड्रिंक्स दिए जाने चाहिए ?

|            |   |
|------------|---|
| Yes<br>हाँ | 1 |
| No<br>नहीं | 2 |

1623

- Q502 SHOWCARD Q502** Do you remember who gave you the advice? **MULTIPLE CODING POSSIBLE**  
क्या आपको याद है सलाह किसने दी थी ?

|                                                       |                                                |    |
|-------------------------------------------------------|------------------------------------------------|----|
| A paediatrician                                       | एक बाल विशेषज्ञ                                | 01 |
| Another type of health professional                   | स्वास्थ्य पेशेवर का कोई प्रकार                 | 02 |
| A relative (own mom, aunt, mother-in-law) or friend   | एक रिश्तेदार या दोस्त                          | 03 |
| Information from TV, radio, newspaper or other media  | टीवी, रेडियो, अखबार, या अन्य मीडिया से जानकारी | 04 |
| Others (Please specify _____)                         | अन्य (कृपया स्पष्ट करें .....                  |    |
| Others (Please specify _____)                         | अन्य (कृपया स्पष्ट करें .....                  |    |
| Don't know/Don't remember ( <b>DON'T SHOW/ READ</b> ) | पता नहीं/ याद नहीं                             | 98 |

1624-31

- Q504** Are there any foods containing iron? **SINGLE CODING ONLY**  
क्या किसी फूड/आहार में आयरन होता है ?

|                                                                             |    |
|-----------------------------------------------------------------------------|----|
| Yes<br>हाँ                                                                  | 01 |
| No<br>नहीं                                                                  | 02 |
| Don't know/Don't remember ( <b>DON'T SHOW/ READ</b> )<br>पता नहीं/ याद नहीं | 98 |

1647-48

## ASK Q505/ Q506 IF CODED '1' IN Q504

## Q505 SHOWCARD Q505 Do you know which foods and drinks are rich in iron? MULTIPLE CODING POSSIBLE

क्या आपको पता है कौन से खाद्य और पेय आयरन में समृद्ध हैं ?

|                                                                                                                             |                                                                                                                             |    |
|-----------------------------------------------------------------------------------------------------------------------------|-----------------------------------------------------------------------------------------------------------------------------|----|
| Breast Milk                                                                                                                 | माँ का दूध                                                                                                                  | 01 |
| Cereals like Daliya/ Khichdi/ Mixed Grains/ Sewiya                                                                          | सीरियल्स जैसे दलिया/खिचड़ी/मिले अनाज/सेवईया                                                                                 | 02 |
| Cereals like Ragji/ Barley/ Bajra/ Maize/ Corn                                                                              | सीरियल्स जैसे रागी/जौ/बाजरा/मक्का/दाना                                                                                      | 03 |
| Oats/ Corn flakes/ Rice flakes                                                                                              | ओट्स/ कोर्नफ्लेक्स/ चावल के फ्लेक्स                                                                                         | 04 |
| Rice/ Rice based dishes                                                                                                     | चावल/ चावल से बने व्यंजन                                                                                                    | 05 |
| Packaged Infant Cereals                                                                                                     | पैकेज्ड इनफेंट सीरियल्स/ बेबी फूड                                                                                           | 06 |
| Legumes like pulses, chana etc.                                                                                             | फली जैसे दालें, चना आदि                                                                                                     | 07 |
| Roti, Paratha, Bread, Dosa, Poori etc.                                                                                      | रोटी, पराठा, ब्रेड, डोसा, पूरी आदि                                                                                          | 08 |
| Packaged Powdered Milk                                                                                                      | पैकेज्ड पाउडर्ड दूध                                                                                                         | 09 |
| Homemade Snacks like poha, semolina/ suji/ rawa, halwa, upma, idli, puffed rice, Idiyappam, sattu, chattuah, sabudana etc.  | घर में बने स्नेक्स जैसे पोहा, सेमोलिना/सूजी/रवा, हलवा, उपमा, इडली, फूले चावल, इडियापन, सत्तू, छतूआ, साबुदाना आदि            | 10 |
| Cow milk/ buffalo milk (packaged or loose)                                                                                  | गाय का दूध/भैंस का दूध (पैकेज्ड या खुला)                                                                                    | 11 |
| Milk products like curd, raita, lassi/ chaach, cream, tea, coffee, paneer, khoya, shakes, ice cream etc                     | दूध के प्रोडक्ट्स जैसे दही, रायता, लस्सी/छाछ, क्रीम, चाय, कॉफी, पनीर, खोवा, शेक्स, आईसक्रीम आदि.                            | 12 |
| Non vegetarian foods and non veg soups                                                                                      | माँसाहारी खाने और माँसाहारी सूप्स                                                                                           | 13 |
| Infant formulas                                                                                                             | इनफेंट फार्मूला                                                                                                             | 14 |
| Fruits/ Fruit Juices/ Neembu pani                                                                                           | फल/ फलों के जूस/ नींबू पानी                                                                                                 | 15 |
| Packaged snacks/ foods like biscuits, chips, soft drinks, confectionary items, namkeens, milk additives likes Horlicks etc. | पैकेज्ड स्नेक्स/फूड्स जैसे बिस्कुट्स, चिप्स, सॉफ्ट ड्रिंक्स, कॉन्फेक्शनरी सामग्रियाँ, नमकीस, दूध एडीटिव्स जैसे हॉरलिक्स आदि | 16 |
| Vegetables and vegetable soups                                                                                              | सब्जियाँ और सब्जियों के सूप्स                                                                                               | 17 |
| Any other _____<br>कोई अन्य                                                                                                 |                                                                                                                             |    |
| Any other _____<br>कोई अन्य                                                                                                 |                                                                                                                             |    |
| Don't know/Don't remember (DON'T SHOW/ READ)<br>पता नहीं/याद नहीं                                                           |                                                                                                                             | 98 |

1649-64

## Q506 SHOWCARD Q506 What are the health consequences of too little iron in foods and drinks? MULTIPLE CODING POSSIBLE

खाने और पीने में बहुत थोड़े आयरन के स्वास्थ्य परिणाम क्या हैं ?

|                                              |                                                      |    |
|----------------------------------------------|------------------------------------------------------|----|
| Impact on eyesight                           | आँखों की दृष्टि पर प्रभाव                            | 05 |
| Anemia/ Blood deficiency                     | एनिमिया/ रक्त की कमी                                 | 01 |
| Lethargy/ Weakness                           | सुस्ती/ कमजोरी                                       | 02 |
| Skin Related problems like allergy, rashes   | त्वचा से सम्बन्धित समस्याएँ जैसे एलर्जी, चकत्ते/ रैश | 06 |
| Hair related problems                        | बालों से सम्बन्धित समस्याएँ                          | 07 |
| Irritability                                 | चिडचिडापन                                            | 03 |
| Problems in digestion                        | पाचन की समस्याएँ                                     | 08 |
| Impact on bones strength                     | हड्डियों की मजबूती पर प्रभाव                         | 09 |
| Mental development                           | मानसिक विकास                                         | 04 |
| Others, please specify:                      | अन्य, कृपया स्पष्ट करें                              |    |
| Others, please specify:                      | अन्य, कृपया स्पष्ट करें                              |    |
| Don't know/Don't remember (DON'T SHOW/ READ) | पता नहीं/ याद नहीं                                   | 98 |

1665-72

## ASK Q510-514 IF PACKAGED INFANT CEREAL CODED IN Q301 (SERVED IN PAST 3 DAYS)

## Q510 Do you serve packaged infant cereals/ baby foods that contain added vitamins and minerals? SINGLE CODING ONLY

क्या आप पैकेज्ड शिशु अनाज/ शिशु आहार सर्व करती हैं जो कि विटामिन और मिनरल युक्त होते हैं ?

|                                                                             |    |
|-----------------------------------------------------------------------------|----|
| Yes<br>हाँ                                                                  | 01 |
| No<br>नहीं                                                                  | 02 |
| Don't know/Don't remember ( <b>DON'T SHOW/ READ</b> )<br>पता नहीं/ याद नहीं | 98 |

1750-51

**Q511** Until what age do you plan to provide packaged infant cereals/ baby foods to your child? **IF DON'T KNOW; RECORD 98**

किस उम्र तक आप आपके बच्चे के लिए पैकेज्ड शिशु अनाज/ शिशु आहार प्रदान करने की योजना बना रही है ?

|                                 |  |  |         |
|---------------------------------|--|--|---------|
| Maximum age of child (in years) |  |  | 1752-53 |
|---------------------------------|--|--|---------|

**Q512 SHOWCARD Q512** Did you receive any advice on giving packaged infant cereals/ baby foods to [REFERENT CHILD]? **SINGLE CODING ONLY**

क्या आपने ..... के लिए पैकेज्ड शिशु अनाज/ शिशु आहार देने पर कोई सलाह प्राप्त की थी ?

|                                                                                                        |                                                                                             |    |
|--------------------------------------------------------------------------------------------------------|---------------------------------------------------------------------------------------------|----|
| Yes, I have received advice <b>NOT</b> to give packaged infant cereals/ baby foods to [REFERENT CHILD] | हाँ, मैंने ..... के लिए पैकेज्ड शिशु अनाज/ शिशु आहार <b>नहीं</b> देने की सलाह प्राप्त की है | 01 |
| Yes, I have received advice to give packaged infant cereals/ baby foods to [REFERENT CHILD]            | हाँ, मैंने ..... के लिए पैकेज्ड शिशु अनाज/ शिशु आहार देने की सलाह प्राप्त की है             | 02 |
| No, I have not received any advice                                                                     | नहीं, मैंने कोई सलाह प्राप्त नहीं की है                                                     | 03 |
| Don't know/Don't remember ( <b>DON'T SHOW/ READ</b> )                                                  | पता नहीं/ याद नहीं                                                                          | 98 |

1754-55

**Q513 SHOWCARD Q513** Do you remember who gave you the advice? **MULTIPLE CODING POSSIBLE**  
क्या आपको याद है सलाह किसने दी थी ?

|                                                       |                                                |    |
|-------------------------------------------------------|------------------------------------------------|----|
| A paediatrician                                       | एक बाल विशेषज्ञ                                | 01 |
| Another type of health professional                   | स्वास्थ्य पेशेवर का कोई प्रकार                 | 02 |
| A midwife                                             | एक मिडवाइफ                                     | 03 |
| A relative (own mom, aunt, mother-in-law) or friend   | एक रिश्तेदार या दोस्त                          | 04 |
| Information from TV, radio, newspaper or other media  | टीवी, रेडियो, अखबार, या अन्य मीडिया से जानकारी | 05 |
| Others, please specify:                               | अन्य, कृपया स्पष्ट करें                        |    |
| Don't know/Don't remember ( <b>DON'T SHOW/ READ</b> ) | पता नहीं/ याद नहीं                             | 98 |

1756-65

**Q514** What was the age of [REFERENT CHILD] when the advice was given? **RECORD IN MONTHS. IF ADVICE WAS GIVEN DURING PREGNANCY PUT "00"**

..... की उम्र क्या थी जब सलाह गयी थी ?

|                                                |  |  |         |
|------------------------------------------------|--|--|---------|
| Age of child (IN MONTHS) when advice was given |  |  | 1766-67 |
|------------------------------------------------|--|--|---------|

### CLASSIFICATION SECTION

**Q601** How many people are permanently living in this house? Please exclude household help/s if any. **RECORD VERBATIM WITH LEADING ZEROES**

इस परिवार में स्थायी रूप से कितने लोग रहते हैं ? कृपया घरेलू सहायको को शामिल नहीं करें।

|                      |  |  |         |
|----------------------|--|--|---------|
| No. of members in HH |  |  | 1768-69 |
|----------------------|--|--|---------|

**Q602** And how many working members are there in your household? **RECORD VERBATIM WITH LEADING ZEROES**  
और आपके परिवार में कितने कार्यरत सदस्य हैं ?

|                              |  |  |         |
|------------------------------|--|--|---------|
| No. of working members in HH |  |  | 1770-71 |
|------------------------------|--|--|---------|

- Q603** May we know which of these monthly household income ranges does your household monthly income belongs to? **SINGLE CODING ONLY**  
क्या हम जान सकते हैं इनमे से कौन सा मासिक पारिवारिक आय रेंज मे आपके परिवार की मासिक आय संबंध रखती है ?

|                                                         |   |
|---------------------------------------------------------|---|
| Less than Rs. 3,000<br>3 0 0 0 रूपए से कम               | 1 |
| Rs. 3,001 to Rs. 5,000                                  | 2 |
| Rs. 5,001 to Rs. 10,000                                 | 3 |
| Rs. 10,001 to Rs. 20,000                                | 4 |
| Rs. 20,001 to Rs. 30,000                                | 5 |
| Rs. 30,001 to Rs. 40,000                                | 6 |
| Rs. 40,001 to Rs. 50,000                                | 7 |
| More than Rs. 50,000<br>5 0, 0 0 0 रूपए से ज्यादा       | 8 |
| Not disclosed ( <b>DO NOT SHOW/ READ</b> )<br>नही बताया | 9 |

1772

- Q604 SHOWCARD Q604** Please tell me which of the following applies to the your house? **SINGLE CODING ONLY**  
कृप्या मुझे बताए निम्नलिखित मे से कौन सा आपके घर के लिए लागु होता है ?

|                   |                |   |
|-------------------|----------------|---|
| Apartment         | अपार्टमेंट     | 1 |
| Bungalow          | बंग्लो         | 2 |
| Independent House | स्वतंत्र मकान  | 3 |
| Independent Floor | स्वतंत्र फ्लोर | 4 |

1773

- Q605 SHOWCARD Q605** And which of the following applies to the ownership of this house? **SINGLE CODING ONLY**  
और निम्नलिखित मे से कौन सा इस घर के लिए स्वामित्व पर लागु होता है ?

|        |                      |   |
|--------|----------------------|---|
| Rented | किराए का             | 1 |
| Owned  | स्वामित्व<br>प्राप्त | 2 |

1774

- Q606** Do you or any member in your household own any other house? **SINGLE CODING ONLY**  
क्या आप या आपके परिवार का कोई सदस्य किसी अन्य घर का स्वामित्व रखता है ?

- Q607** Do you or any member in your household own any agricultural land? **SINGLE CODING ONLY**  
क्या आप या आपके परिवार का कोई सदस्य किसी कृषि योग्य भूमि का स्वामित्व रखता है ?

- Q608** Do you or any member in your household have a bank account or a post office account? **SINGLE CODING ONLY**  
क्या आप या आपके परिवार के किसी सदस्य के पास बैंक खाता या डाक घर खाता है ?

|         | Q606 | Q607 | Q608 |
|---------|------|------|------|
| Yes हाँ | 1    | 1    | 1    |
| No नहीं | 2    | 2    | 2    |

1775

1776

1777

**Q609 SHOW CARD Q609** what is the main source of drinking water for members of your household? **SINGLE CODING ONLY**

आपके परिवार के सदस्यों के लिए पीने के पानी का मुख्य स्रोत क्या है ?

**Q610 SHOW CARD Q610** what is the main source of main source of water used by members of your household for other purposes such as cooking and hand washing? **SINGLE CODING ONLY**

आपके परिवार के सदस्यों द्वारा अन्य उद्देश्यों जैसे कूकिंग और हाथ धोने के लिए इस्तेमाल किए जाने वाले पानी के मुख्य स्रोत क्या है ?

|                                                                         |                                                           | Q609 | Q610 |
|-------------------------------------------------------------------------|-----------------------------------------------------------|------|------|
| <i>Piped water</i>                                                      | पाईप वाला पानी                                            |      |      |
| Piped to dwelling                                                       | घर में पाईप से                                            | 01   | 01   |
| Piped to yard/plot                                                      | गार्ड/प्लॉट में पाईप से                                   | 02   | 02   |
| From public tap, standpipe                                              | पब्लिक नल/स्टैंडपाईप से                                   | 03   | 03   |
| Water from tube well or borehole                                        | नलकूप या बोरवेल से पानी                                   | 04   | 04   |
| Rainwater                                                               | बरसात का पानी                                             | 05   | 05   |
| <i>Dug well</i>                                                         | खुदे हुए कुएँ                                             |      |      |
| Protected well                                                          | सुरक्षित कुआँ                                             | 06   | 06   |
| Unprotected well                                                        | असुरक्षित कुआँ                                            | 07   | 07   |
| <i>Water from spring</i>                                                | झरने का पानी                                              |      |      |
| Protected spring                                                        | सुरक्षित झरना                                             | 08   | 08   |
| Unprotected spring                                                      | असुरक्षित झरना                                            | 09   | 09   |
| Tanker truck                                                            | टैंकर ट्रक                                                | 10   | 10   |
| Cart with small tank                                                    | ठेले वाला छोटा टैंक                                       | 11   | 11   |
| Surface water (river/dam/<br>lake/pond/stream/canal/irrigation channel) | सतह का पानी (नदी/ डेम/ झील/<br>तालाब/भाप/नहर/सिंचाई चैनल) | 12   | 12   |
| Bottled water                                                           | बोतल का पानी                                              | 13   | 13   |
| Other (please specify)<br>अन्य (कृपया स्पष्ट करें) _____                |                                                           |      |      |

1778-79 1780-81

**Q611** Do you do anything to the water to make it safer to drink? **SINGLE CODING ONLY**

क्या आप पानी को सुरक्षित पीने का पानी बनाने के लिए कुछ करते हैं ?

|            |   |             |
|------------|---|-------------|
| Yes<br>हाँ | 1 | → GO TO 612 |
| No<br>नहीं | 2 | → GO TO 613 |

1782

**ASK IF '1' CODED IN Q611**

**Q612 SHOW CARD Q612** Please tell me what do you do to make the water safer to drink? **SINGLE CODING ONLY**

कृपया मुझे बताएं आप पानी को सुरक्षित पीने का पानी बनाने के लिए क्या करते हैं ?

|                                     |                                               |   |
|-------------------------------------|-----------------------------------------------|---|
| Boil it                             | उसे उबालते हैं                                | 1 |
| Filter it using water filter        | वॉटर फिल्टर का उपयोग करके उसे फिल्टर करते हैं | 2 |
| Use water purifier/ RO              | वॉटर प्युरीफायर/ आर ओ का इस्तेमाल करते हैं    | 3 |
| Any other (please specify)<br>_____ | कोई अन्य (कृपया स्पष्ट करें)                  |   |

1783

**Q613** Do you use a different water source for your children? **SINGLE CODING ONLY**

क्या आपके बच्चों के लिए आप अलग अलग पानी के स्रोत उपयोग करते हैं ?

|            |   |             |
|------------|---|-------------|
| Yes<br>हाँ | 1 | → GO TO 614 |
| No<br>नहीं | 2 | → GO TO 615 |

1784

**ASK IF '1' CODED IN Q613****Q614 SHOW CARD Q614** Which water source do you use for your children? **SINGLE CODING ONLY**

आपके बच्चों के लिए आप कौन सा पानी का स्रोत इस्तेमाल करते हैं ?

|                                                                         |                                                           |    |
|-------------------------------------------------------------------------|-----------------------------------------------------------|----|
| <i>Piped water</i>                                                      | पाईप वाला पानी                                            |    |
| Piped to dwelling                                                       | घर में पाईप से                                            | 01 |
| Piped to yard/plot                                                      | गार्ड/प्लॉट में पाईप से                                   | 02 |
| From public tap, standpipe                                              | पब्लिक नल/स्टैंडपाईप से                                   | 03 |
| Water from tube well or borehole                                        | नलकूप या बोरबेल से पानी                                   | 04 |
| Rainwater                                                               | बरसात का पानी                                             | 05 |
| <i>Dug well</i>                                                         | खुदे हुए कुएँ                                             |    |
| Protected well                                                          | सुरक्षित कुआँ                                             | 06 |
| Unprotected well                                                        | असुरक्षित कुआँ                                            | 07 |
| <i>Water from spring</i>                                                | झरने का पानी                                              |    |
| Protected spring                                                        | सुरक्षित झरना                                             | 08 |
| Unprotected spring                                                      | असुरक्षित झरना                                            | 09 |
| Tanker truck                                                            | टैंकर ट्रक                                                | 10 |
| Cart with small tank                                                    | ढेले वाला छोटा टैंक                                       | 11 |
| Surface water (river/dam/<br>lake/pond/stream/canal/irrigation channel) | सतह का पानी (नदी/ डेम/ झील/<br>तालाब/भाप/नहर/सिंचाई चैनल) | 12 |
| Bottled water                                                           | बोतल का पानी                                              | 13 |
| Other (please specify)<br>अन्य (कृपया स्पष्ट करें) _____                |                                                           |    |

1785-86

**Q615** Do you do anything to the water to make water safer for your children to drink? **SINGLE CODING ONLY**

क्या आप पानी को सुरक्षित पीने का पानी बनाने के लिए कुछ करते हैं ?

|         |   |             |
|---------|---|-------------|
| Yes हाँ | 1 | → GO TO 616 |
| No नहीं | 2 | → GO TO 617 |

1787

**ASK IF '1' CODED IN Q615****Q616 SHOW CARD Q616** Please tell me what do you do to make the water for your children safer to drink? **SINGLE CODING ONLY**

कृपया मुझे बताएं आपके बच्चे के लिए पीने के पानी को सुरक्षित बनाने के लिए आप क्या करते हैं ?

|                                  |                                               |   |
|----------------------------------|-----------------------------------------------|---|
| Boil it                          | उसे उबालते हैं                                | 1 |
| Filter it using water filter     | वॉटर फिल्टर का उपयोग करके उसे फिल्टर करते हैं | 2 |
| Use water purifier/ RO           | वॉटर प्युरीफायर/ आरओ का इस्तेमाल करते हैं     | 3 |
| Any other (please specify) _____ | कोई अन्य (कृपया स्पष्ट करें)                  |   |

1788

**Q617 SHOW CARD Q617** What type of fuel does your household mainly use for cooking? **SINGLE CODING ONLY**

आपके परिवार में खाना पकाने के लिए मुख्य रूप से किस प्रकार का ईंधन उपयोग किया जाता है ?

|                         |                       |    |
|-------------------------|-----------------------|----|
| Electricity             | बिजली                 | 01 |
| LPG/ Natural Gas        | एलपीजी/ प्राकृतिक गैस | 02 |
| Biogas                  | बायोगैस               | 03 |
| Kerosene                | मिट्टी का तेल         | 04 |
| Coal/ Lignite           | कोयला/ लिगनाइट        | 05 |
| Charcoal                | चारकोल                | 06 |
| Wood                    | लकड़ी                 | 07 |
| Straws/ shrubs/ grass   | घास/ भुसा/ तिनके      | 08 |
| Agricultural crop waste | कृषि फसल का कचरा      | 09 |
| Dung Cakes              | गोबर के उपले          | 10 |
| Any Other               | कोई अन्य              |    |

1811-12

**SHOWCARD Q618****Q618** Please look at this card and tell me what kind of toilet facility do members of your household usually use? **SINGLE CODING ONLY**

कृपया इस कार्ड को देखें और मुझे बताएं आपका परिवार आमतौर पर किस प्रकार की शौचालय सुविधा का इस्तेमाल कर रहा है ?

|                                   |                                     |    |
|-----------------------------------|-------------------------------------|----|
| <b>FLUSH OR POUR FLUSH TOILET</b> | फ्लश या पानी डालने वाला फ्लश टॉयलेट |    |
| Flush to piped sewer system       | पाईप सीवर सिस्टम वाला फ्लश          | 01 |

|                                                |                                                           |    |
|------------------------------------------------|-----------------------------------------------------------|----|
| Flush to septic tank                           | सेप्टिक टैंक वाला फ्लश                                    | 02 |
| Flush to pit latrine                           | पिट लैट्रीन वाला फ्लश                                     | 03 |
| Flush to somewhere else                        | कहीं और फ्लश                                              | 04 |
| Flush, don't know where                        | फ्लश कहाँ है नहीं जानता                                   | 05 |
| <b>PIT LATRINE</b>                             | <b>पिट लैट्रीन</b>                                        |    |
| Ventilated improved pit (VIP) / biogas latrine | वेनटीलेटेड इम्प्रूव्ड पिट (वीआईपी)/बायोगैस लैट्रीन        | 06 |
| Pit latrine with slab                          | स्लेब वाली पिट लैट्रीन                                    | 07 |
| Pit latrine without slab/ Open pit             | बिना स्लेब वाली पिट लैट्रीन/ खुला पिट/ गड्ढा              | 08 |
| Twin pit/composting toilet                     | ट्वीन/दो पिट/ कम्पोजिटिंग टॉयलेट                          | 09 |
| Dry toilet                                     | ड्राई टॉयलेट                                              | 10 |
| No facility/uses open space Or field           | कोई सुविधा नहीं/ खुली जगहों या मैदान का इस्तेमाल करते हैं | 11 |
| Any Other<br>कोई अन्य                          |                                                           |    |

1813-14

**Q619** And how many toilets are there in your household? **RECORD VERBATIM WITH LEADING ZEROES**  
और आपके परिवार में कितने शौचालय हैं ?

|                                                              |  |  |         |
|--------------------------------------------------------------|--|--|---------|
| <b>No. of toilets in HH</b><br>परिवार में शौचालयों की संख्या |  |  | 1815-16 |
|--------------------------------------------------------------|--|--|---------|

**Q620** Do you share this toilet facility with other households? **SINGLE CODING ONLY**  
क्या आप अन्य परिवारों के साथ इस टॉयलेट सुविधा को बाँटते हैं ?

|         |   |
|---------|---|
| Yes हाँ | 1 |
| No नहीं | 2 |

1817

**Q621 SHOWCARD Q621** Please look at this card and tell me, does your household or any member of your household have/own: **MULTIPLE CODING POSSIBLE**

कृपया इस कार्ड को देखें और मुझे बताएं, क्या आपके परिवार या परिवार के किसी सदस्य के पास ..... का स्वामित्व है।

|                        |                              |    |                           |                             |    |
|------------------------|------------------------------|----|---------------------------|-----------------------------|----|
| Electricity Connection | बिजली का कनेक्शन             | 01 | Motorcycle / scooter      | मोटरसाइकिल/ स्कूटर          | 16 |
| Mattress               | मैट्रेस                      | 02 | Refrigerator              | रेफ्रिजरेटर                 | 17 |
| Pressure cooker        | प्रेसर कूकर                  | 03 | Mobile phone              | टेलीफोन/ मोबाइल             | 18 |
| Chair                  | कुर्सी                       | 04 | Any other type of phone   | कोई अन्य प्रकार का फोन      | 19 |
| Cot or bed             | कोट या बिस्तर                | 05 | B/W Television            | ब्लैक/व्हाइट टेलीविजन       | 20 |
| Table                  | टेबल                         | 06 | Color Television          | कलर टेलीविजन                | 21 |
| Sewing machine         | सिलाई मशीन                   | 07 | Washing Machine           | वॉशिंग मशीन                 | 22 |
| Watch/ clock           | घड़ी                         | 08 | CD/ VCD/ DVD player       | सीडी/ वीसीडी/ डीवीडी प्लेयर | 23 |
| Bicycle                | साइकिल                       | 09 | Radio or transistor       | रेडियो या ट्रांसिस्टर       | 24 |
| Animal drawn cart      | जानवर द्वारा चलने वाली गाड़ी | 10 | Personal computer/ laptop | पर्सनल कंप्यूटर/ लैपटॉप     | 25 |
| Water pump             | पानी का पम्प                 | 11 | Car                       | कार                         | 26 |
| Tractor                | ट्रैक्टर                     | 12 | Truck/ jeep/ van          | ट्रक/ जीप/ वैन              | 27 |
| Electric fan           | बिजली का पंखा                | 13 | Air conditioner           | एयर कंडीशनर                 | 28 |
| LPG stove              | एलपीजी स्टोव                 | 14 | Threshers                 | थ्रेशर्स                    | 29 |
| Stove with electricity | बिजली के साथ स्टोव           | 15 |                           |                             |    |

1818-67

**Q622** How many rooms in this household are used for sleeping? **RECORD VERBATIM WITH LEADING ZEROES**  
इस परिवार में कितने कमरों को सोने के लिए इस्तेमाल किया जाता है ?

|                                                                                                          |  |  |         |
|----------------------------------------------------------------------------------------------------------|--|--|---------|
| <b>No. of rooms used for sleeping in HH</b><br>परिवार में सोने के लिए इस्तेमाल होने वाले कमरों की संख्या |  |  | 1868-69 |
|----------------------------------------------------------------------------------------------------------|--|--|---------|

**Q623** Main material of the floor. **RECORD OBSERVATION**  
फर्श की मुख्य सामग्री

|                   |                           |    |
|-------------------|---------------------------|----|
| Natural Floor     | प्राकृतिक जमीन            |    |
| Mud / clay/ earth | गीली मिट्टी/ चिकनी मिट्टी | 01 |



|                               |                                          |    |
|-------------------------------|------------------------------------------|----|
| Sand                          | रेत                                      | 02 |
| Dung                          | गोबर                                     | 03 |
| Rudimentary Floor             | अल्पविकसित जमीन                          |    |
| Raw Wood planks               | कच्ची लकड़ी का तख्ता                     | 04 |
| Palm/ Bamboo                  | ताड़/बांस                                | 05 |
| Brick                         | ईंट                                      | 06 |
| Stone                         | पत्थर                                    | 07 |
| Finished floor                | तैयार जमीन                               |    |
| Parquet or polished wood      | काठ-खण्ड या पॉलिश लकड़ी                  | 08 |
| Vinyl or asphalt              | प्लास्टिक या डामर                        | 09 |
| Ceramic tiles                 | सेरामिक टाइल्स                           | 10 |
| Cement                        | सीमेंट                                   | 11 |
| Carpet                        | कॉरपेट                                   | 12 |
| Polished stone/marble/Granite | पॉलिश किया हुआ पत्थर/ मारबल/<br>ग्रेनाइट | 13 |
| Any Other<br>कोई<br>अन्य      |                                          |    |

1870-71

**Q624 Main material of the roof. RECORD OBSERVATION**

छत की मुख्य सामग्री।

|                             |                                     |    |
|-----------------------------|-------------------------------------|----|
| <b>NATURAL ROOFING</b>      | प्राकृतिक छत                        |    |
| No roof                     | कोई छत नहीं                         | 01 |
| Thatch/palm leaf/reed/grass | छप्पर/ताड़ के पत्ते/सरकण्डा/<br>घास | 02 |
| Mud                         | गीली मिट्टी                         | 03 |
| Sod/mud and grass mixture   | घास/गीली मिट्टी और घास का<br>मिश्रण | 04 |
| Plastic/polythene sheeting  | प्लास्टिक/पॉलीथीन शीटिंग            | 05 |
| <b>RUDIMENTARY ROOFING</b>  | अल्पविकसित छत                       |    |
| Rustic mat                  | साधारण चटाई                         | 06 |
| Palm/bamboo                 | ताड़/बांस                           | 07 |
| Raw wood planks/timber      | कच्ची लकड़ी का तख्ता/ टिम्बर        | 08 |
| Unburnt brick               | बिना जली ईंट                        | 09 |
| Loosely packed stone        | ढीले पैकड पत्थर                     | 10 |
| <b>FINISHED ROOFING</b>     | तैयार छत                            |    |
| Metal/gi (galvanized iron)  | मेटल/जी आई                          | 11 |
| Wood                        | लकड़ी                               | 12 |
| Calamine/cement fiber       | केलेमाईन/ सीमेंट फाईबर              | 13 |
| Asbestos sheets             | ऐस्बेस्टस शीट्स                     | 14 |
| Rcc/rbc/cement/concrete     | आरसीसी/ आरबीसी/ सीमेंट/<br>कंक्रीट  | 15 |
| Roofing shingles            | रूफिंग शिंगल्स                      | 16 |
| Tiles                       | टाइल्स                              | 17 |
| Slate                       | स्लेट                               | 18 |
| Burnt brick                 | जली ईंट                             | 19 |
| Any Other<br>कोई<br>अन्य    |                                     |    |

1872-73

**Q625 Main material of the walls. RECORD OBSERVATION**

दीवारों की मुख्य सामग्री।

|                          |                                 |    |
|--------------------------|---------------------------------|----|
| <b>NATURAL WALLS</b>     | प्राकृतिक दीवारें               |    |
| No walls                 | कोई दीवारें नहीं                | 01 |
| Cane/palm/trunks/bamboo  | बेंत/ ताड़/ ट्रंक/ बांस         | 02 |
| Mud                      | गीली मिट्टी                     | 03 |
| Grass/reeds/thatch       | घास/ सरकण्डा/ छप्पर             | 04 |
| <b>RUDIMENTARY WALLS</b> | अल्पविकसित दीवारें              |    |
| Bamboo with mud          | गीली मिट्टी के साथ बांस         | 05 |
| Stone with mud           | गीली मिट्टी के साथ पत्थर        | 06 |
| Plywood                  | प्लाइवुड                        | 07 |
| Cardboard                | कार्डबोर्ड                      | 08 |
| Unburnt brick            | बिना जली ईंट                    | 09 |
| Raw wood/reused wood     | कच्ची लकड़ी/ फिर से इस्तेमाल की | 10 |

|                          | गयी लकड़ी                      |    |
|--------------------------|--------------------------------|----|
| <b>FINISHED WALLS</b>    | तैयार दीवारें                  |    |
| Cement/concrete          | सीमेंट/कंक्रीट                 | 11 |
| Stone with lime/cement   | चूना/ सीमेंट के साथ पत्थर      | 12 |
| Burnt bricks             | जली ईंटें                      | 13 |
| Cement blocks            | सीमेंट ब्लॉक्स                 | 14 |
| Wood planks/shingles     | लकड़ी का तख्ता/ शिंगल्स        | 15 |
| Gi/metal/asbestos sheets | जी आई/ मेटल/ ऐस्बेस्टर्स शीट्स | 16 |
| Any Other<br>कोई<br>अन्य |                                |    |

1874-75

**Q626** Type of Windows. **RECORD OBSERVATION**  
खिड़कियों के प्रकार।

|                                  |                                | YES | NO |      |
|----------------------------------|--------------------------------|-----|----|------|
| Windows with glass               | शीशे के साथ खिड़कियां          | 1   | 2  | 1876 |
| Windows with screen              | स्क्रीन के साथ खिड़कियां       | 1   | 2  | 1877 |
| Windows with curtains / shutters | पर्दों/ शटर्स के साथ खिड़कियां | 1   | 2  | 1878 |
| Any Other                        | कोई अन्य                       | 1   | 2  | 1879 |

**SAY:** I would like to know something about the **Chief Wage Earner** in your household. By Chief Wage Earner I mean the person who contributes the most to the household income.

कहे: मैं आपके परिवार में मुख्य कमाने वाले सदस्य के बारे में कुछ जानना चाहूंगा। मुख्य कमाने वाले द्वारा मेरा मतलब व्यक्ति जो पारिवारिक आय के लिए सबसे ज्यादा योगदान देता है।

**Q627** What is his/her occupation (IF RETIRED, ASK: What was his/her occupation before he/she retired?)  
**RECORD VERBATIM AND THEN CODE APPROPRIATELY IN GRID AFTER Q628.**

उनका व्यवसाय क्या है (यदि रिटायर्ड, पूछें: रिटायर होने से पहले उनका व्यवसाय क्या था ?)

**RECORD VERBATIM:** \_\_\_\_\_

**Q628** IF THE PERSON IS A BUSINESSMAN / INDUSTRIALIST, ASK "Roughly how many persons in all are employed by the CWE at his / her establishment?"

अंदाज़न मुख्य कमाने वाले के व्यवसाय पर कितने लोग कार्यरत हैं ?

No. of employees:

1884-87

**Q629** What is the highest level to which he/she has studied? **RECORD VERBATIM AND THEN CODE APPROPRIATELY IN GRID BELOW THEN CODE SEC).**

उनके द्वारा प्राप्त किया गया शिक्षा का उच्चतम स्तर क्या है ?

**RECORD VERBATIM:** \_\_\_\_\_

|                                                          |         | Illiterate | School upto 4yrs | School 5-9 yrs | SSC/ HSC | Some college but not grad. | Grad/Post grad.(gen) | Grad/ Post grad.(Prof) |      |
|----------------------------------------------------------|---------|------------|------------------|----------------|----------|----------------------------|----------------------|------------------------|------|
| Circle Education ▶                                       |         | 1          | 2                | 3              | 4        | 5                          | 6                    | 7                      | 1880 |
| Circle Occupation ▼                                      | 1881-82 |            |                  |                |          |                            |                      |                        |      |
| Unskilled worker                                         | 01      | 8          | 8                | 7              | 6        | 6                          | 6                    | 6                      |      |
| Skilled worker                                           | 02      | 8          | 7                | 6              | 5        | 5                          | 4                    | 4                      |      |
| Petty traders                                            | 03      | 8          | 6                | 6              | 5        | 5                          | 4                    | 4                      |      |
| Shop owner                                               | 04      | 6          | 6                | 5              | 4        | 3                          | 2                    | 2                      |      |
| <b>Businessmen / Industrialist with no. of employees</b> |         |            |                  |                |          |                            |                      |                        |      |
| - None                                                   | 05      | 6          | 5                | 4              | 3        | 2                          | 2                    | 1                      |      |
| - 1-9                                                    | 06      | 5          | 4                | 4              | 3        | 2                          | 1                    | 1                      |      |
| - 10 +                                                   | 07      | 3          | 3                | 2              | 2        | 1                          | 1                    | 1                      |      |
| Self employed professional                               | 08      | 6          | 6                | 6              | 4        | 3                          | 2                    | 1                      |      |
| Clerical                                                 | 09      | 6          | 6                | 6              | 5        | 4                          | 3                    | 3                      |      |
| Supervisory level                                        | 10      | 6          | 6                | 5              | 5        | 4                          | 3                    | 2                      |      |
| <b>Officers / Executives</b>                             |         |            |                  |                |          |                            |                      |                        |      |
| - Junior                                                 | 11      | 5          | 5                | 5              | 4        | 3                          | 2                    | 2                      |      |
| - Middle / Senior                                        | 12      | 3          | 3                | 3              | 3        | 2                          | 1                    | 1                      |      |
| <b>SEC:</b>                                              |         | 1883       |                  |                |          |                            |                      |                        |      |

**Q630** **SHOWCARD Q630** Please tell me which of the following applies to your household. **SINGLE CODING ONLY**  
कृपया मुझे बताये कि आपके घर पर इनमें से कौन-सा लागू होता है ?

|                                      |                                    |   |
|--------------------------------------|------------------------------------|---|
| No one eat non vegetarian food       | कोई भी माँसाहारी खाना नहीं खाता है | 1 |
| Some members eat non vegetarian food | कुछ सदस्य माँसाहारी खाना खाते हैं  | 2 |
| All members eat non vegetarian food  | सभी सदस्य माँसाहारी खाना खाते हैं  | 3 |

**Q631** When **REFERENT CHILD** was last sick with diarrhea did you take him/ her to the doctor? **SINGLE CODING ONLY**  
जब सम्बन्धित बच्चा पिछली बार दस्त से बीमार था तो क्या आप उसे डॉक्टर के पास ले गयीं ?

**Q632** How much did you spend for the treatment of diarrhea (consultation and medication cost)? **RECORD VERBATIM WITH LEADING ZEROES**  
आपने दस्त के उपचार के लिए कितना खर्च किया (कंसलटेशन/परमर्श और दवाई के खर्च को मिलाकर) ?

|                                                                       | Q631 | Q632 (in Rs.) |  |  |  |  |
|-----------------------------------------------------------------------|------|---------------|--|--|--|--|
| Yes<br>हाँ                                                            | 1    |               |  |  |  |  |
| No<br>नहीं                                                            | 2    |               |  |  |  |  |
| Child did not suffer from this disease<br>बच्चे को यह बीमारी नहीं हुई | 3    |               |  |  |  |  |

**Q633** When **REFERENT CHILD** was last sick with lower respiratory tract infection (like bronchitis, pneumonia) did you take him/ her to the doctor? **SINGLE CODING ONLY**  
जब सम्बन्धित बच्चा पिछली बार लोवर रेस्पिरेटरी ट्रेट इनफेक्शन (जैसे फेफड़े की सूजन, नीमोनिया) से बीमार था तो क्या आप उसे डॉक्टर के पास ले गयीं ?

**Q634** How much did you spend for the treatment of lower respiratory tract infection (like bronchitis, pneumonia)? **RECORD VERBATIM WITH LEADING ZEROES**  
आपने लोवर रेस्पिरेटरी ट्रेट इनफेक्शन (जैसे फेफड़े की सूजन, नीमोनिया) के उपचार पर कितना खर्च किया ?

|                                                                       | Q633 | Q634 (in Rs.) |  |  |  |  |
|-----------------------------------------------------------------------|------|---------------|--|--|--|--|
| Yes<br>हाँ                                                            | 1    |               |  |  |  |  |
| No<br>नहीं                                                            | 2    |               |  |  |  |  |
| Child did not suffer from this disease<br>बच्चे को यह बीमारी नहीं हुई | 3    |               |  |  |  |  |

**Q503** Now, I'll read out some statements in regard with nutritional requirements of kids in the age group 6-23 months. As I read each statement, please look at this card and tell me, **SHOWCARD Q503** how strongly do you agree or disagree that this statement applies to you. **READ OUT STATEMENTS ONE BY ONE. ROTATE STATEMENTS. SINGLE CODING PER STATEMENT**

अब मैं 6-23 महीनों के आयु समूह में बच्चों की आवश्यक पोषक के संबंध में कुछ वाक्यों को पढ़ूंगा। जैसे मैं प्रत्येक वाक्य पढ़ूँ, कृपया इस कार्ड को देखें और मुझे बताएं, आपके लिए यह वाक्य लागू होता इस बात से आप कितना सहमत या असहमत हैं।

| TICK START |                                                                                   | Strongly disagree<br>पूरी तरह असहमत                                                  | Somewhat disagree<br>थोड़ा असहमत | disagree<br>ना सहमत ना | Somewhat agree<br>थोड़ा सहमत | Strongly agree<br>पूरी तरह सहमत | DK/ CS (DO NOT SHOW/<br>READ) |   |      |
|------------|-----------------------------------------------------------------------------------|--------------------------------------------------------------------------------------|----------------------------------|------------------------|------------------------------|---------------------------------|-------------------------------|---|------|
|            | Carbohydrates are required to provide energy to child                             | बच्चे को उर्जा प्रदान करने के लिए कार्बोहाइड्रेट आवश्यक है                           | 1                                | 2                      | 3                            | 4                               | 5                             | 9 | 1632 |
|            | Calcium is important for bone development of child                                | बच्चे के हड्डी के विकास के लिए कैल्सियम महत्वपूर्ण है                                | 1                                | 2                      | 3                            | 4                               | 5                             | 9 | 1633 |
|            | Calcium is important for tooth development of child                               | बच्चे के दांतों के विकास के लिए कैल्सियम महत्वपूर्ण है                               | 1                                | 2                      | 3                            | 4                               | 5                             | 9 | 1634 |
|            | Child requires Vitamin D for proper formation of bones                            | हड्डियों के सही गठन के लिए बच्चे में विटामिन डी आवश्यक है                            | 1                                | 2                      | 3                            | 4                               | 5                             | 9 | 1635 |
|            | Child requires Iron for blood development                                         | रक्त विकास के लिए आयरन बच्चे में आवश्यक है                                           | 1                                | 2                      | 3                            | 4                               | 5                             | 9 | 1636 |
|            | Vitamin A helps in formation of healthy skin and hair of child                    | बच्चे की स्वस्थ त्वचा और बालों के गठन में विटामिन ए मदद करता है                      | 1                                | 2                      | 3                            | 4                               | 5                             | 9 | 1637 |
|            | Vitamin A is good for proper eyesight of child                                    | बच्चे की सही दृष्टि के लिए विटामिन ए अच्छा है                                        | 1                                | 2                      | 3                            | 4                               | 5                             | 9 | 1638 |
|            | Child requires all nutrients for proper growth and development                    | बच्चे को सही विकास और वृद्धि के लिए सभी पोषकों की जरूरत है                           | 1                                | 2                      | 3                            | 4                               | 5                             | 9 | 1639 |
|            | The food should have Iodine which is essential for child                          | खाने में आयोडिन होना चाहिए जो कि बच्चे के लिए महत्वपूर्ण है                          | 1                                | 2                      | 3                            | 4                               | 5                             | 9 | 1640 |
|            | Fat content in food is required for physical growth of child                      | बच्चे के शारीरिक विकास के लिए खाने में युक्त फैट आवश्यक है                           | 1                                | 2                      | 3                            | 4                               | 5                             | 9 | 1641 |
|            | The food should be easy to digest                                                 | खाना पचाने के लिए आसान होना चाहिए                                                    | 1                                | 2                      | 3                            | 4                               | 5                             | 9 | 1642 |
|            | There should be variety in food given to child so that all nutrients are provided | दिए गए आहार में विविधता होनी चाहिए ताकि सभी पोषक प्रदान किए जा सकें                  | 1                                | 2                      | 3                            | 4                               | 5                             | 9 | 1643 |
|            | Zinc is important for formation of protein in body which helps in growth of child | जिंक शरीर में प्रोटीन की बनावट के लिए महत्वपूर्ण है जो बच्चे के विकास में सहायक है   | 1                                | 2                      | 3                            | 4                               | 5                             | 9 | 1644 |
|            | Child requires Zinc for blood formation                                           | रक्त के बनने के लिए बच्चे को जिंक की जरूरत होती है                                   | 1                                | 2                      | 3                            | 4                               | 5                             | 9 | 1645 |
|            | Child requires Zinc to help maintain a healthy immune system                      | एक स्वस्थ प्रतिरक्षा प्रणाली बनाए रखने में मदद के लिए बच्चे को जिंक की जरूरत होती है | 1                                | 2                      | 3                            | 4                               | 5                             | 9 | 1646 |

**Q508** We would like to understand what you think about infant cereals as food for your child. I will now read a list of statements and ask you if you agree with them or not. **SINGLE CODING PER STATEMENT**  
हम समझना चाहेंगे आपके बच्चे के लिए खाद्य के रूप में आप शिशु सीरियल के बारे में क्या सोचते हैं। मैं वाक्यों की एक सूची पढ़ूंगा और आपसे उनके साथ सहमति के लिए पूछूंगा।

| TICK START |                                                                                                                             |                                                                                            | Disagree<br>असहमत | Agree<br>सहमत | DK/CS (DO<br>NOT SHOW/<br>READ) |      |
|------------|-----------------------------------------------------------------------------------------------------------------------------|--------------------------------------------------------------------------------------------|-------------------|---------------|---------------------------------|------|
|            | A child that is thin or frequently sick should eat more cereals                                                             | एक बच्चा जो कि पतला है या ज्यादा बीमार होता है उसे ज्यादा अनाज चाहिए                       | 1                 | 2             | 9                               | 1741 |
|            | Cereals are better for my child than Fast Food                                                                              | अनाज मेरे बच्चे के लिए फास्ट फूड से बेहतर है                                               | 1                 | 2             | 9                               | 1742 |
|            | Homemade cereals are better for my child than packaged infant cereals                                                       | घर पर बने अनाज मेरे बच्चे के लिए पैकेज्ड अनाज से ज्यादा बेहतर है                           | 1                 | 2             | 9                               | 1743 |
|            | Cereals contain much of the energy a child needs                                                                            | अनाज में एक बच्चे के लिए आवश्यक ज्यादा उर्जा होती है                                       | 1                 | 2             | 9                               | 1744 |
|            | Cereals contain nutrients that are lacking in other foods of children's diet                                                | अनाज पोषक युक्त होता है जो कि बच्चे के अन्य आहार में कम होते हैं                           | 1                 | 2             | 9                               | 1745 |
|            | Cereals best suited for small children (6-23m) is different from cereals suited for children over 3 years of age and adults | 3 वर्ष की आयु और बड़े बच्चों के लिए उपयुक्त अनाज छोटे बच्चों के लिए उपयुक्त अनाज से अलग है | 1                 | 2             | 9                               | 1746 |
|            | Cereals are required for growing children                                                                                   | बढ़ते बच्चे के लिए अनाज जरूरी है                                                           | 1                 | 2             | 9                               | 1747 |
|            | Cereals are required when only milk is not sufficient for child                                                             | बच्चे के लिए जब केवल दूध पर्याप्त नहीं है तब अनाज जरूरी है                                 | 1                 | 2             | 9                               | 1748 |
|            | Cereals are filling                                                                                                         | अनाज पेट भरने वाले हैं                                                                     | 1                 | 2             | 9                               | 1749 |

**THANK & CLOSE THE INTERVIEW**
